# Supplementary material
Source: PubMed Central journal article supplement (PMC7114752)
Supplement: ao0c00205_si_003.pdf [file ao0c00205_si_003.pdf]

# Supporting Information

## Homology modeling of human UDP-glucuronosyltransferase 1A6 reveals insights into factors influencing substrate and co-substrate binding

*Alexander D. Smith, Brent D.G. Page, Abby C. Collier, and Michael W.H. Coughtrie\**

Faculty of Pharmaceutical Sciences, The University of British Columbia, 2405 Wesbrook Mall, Vancouver, BC V6T 1Z3, CANADA

\*E-mail: michael.coughtrie@ubc.ca.

### Table of Contents

|                |     |                |         |
|----------------|-----|----------------|---------|
| 1. Figure S1   | S2  | 19. Table S4   | S19     |
| 2. Figure S2   | S3  | 20. Table S5   | S20     |
| 3. Figure S3   | S4  | 21. Table S6   | S21-S24 |
| 4. Figure S4   | S5  | 22. Table S7   | S24     |
| 5. Figure S5   | S6  | 23. Table S8   | S25     |
| 6. Figure S6   | S7  | 24. Table S9   | S26-S27 |
| 7. Figure S7   | S8  | 25. Table S10  | S28-S31 |
| 8. Figure S8   | S9  | 26. Table S11  | S31     |
| 9. Figure S9   | S10 | 27. Table S12  | S32     |
| 10. Figure S10 | S11 | 28. Table S13  | S33-S34 |
| 11. Figure S11 | S12 | 29. Table S14  | S35     |
| 12. Figure S12 | S13 | 30. Table S15  | S36     |
| 13. Figure S13 | S14 | 31. Table S16  | S37     |
| 14. Figure S14 | S15 | 32. Table S17  | S38     |
| 15. Figure S15 | S16 | 33. Table S18  | S39-S40 |
| 16. Table S1   | S17 | 34. Table S19  | S41     |
| 17. Table S2   | S17 | 35. References | S42-S45 |
| 18. Table S3   | S18 |                |         |

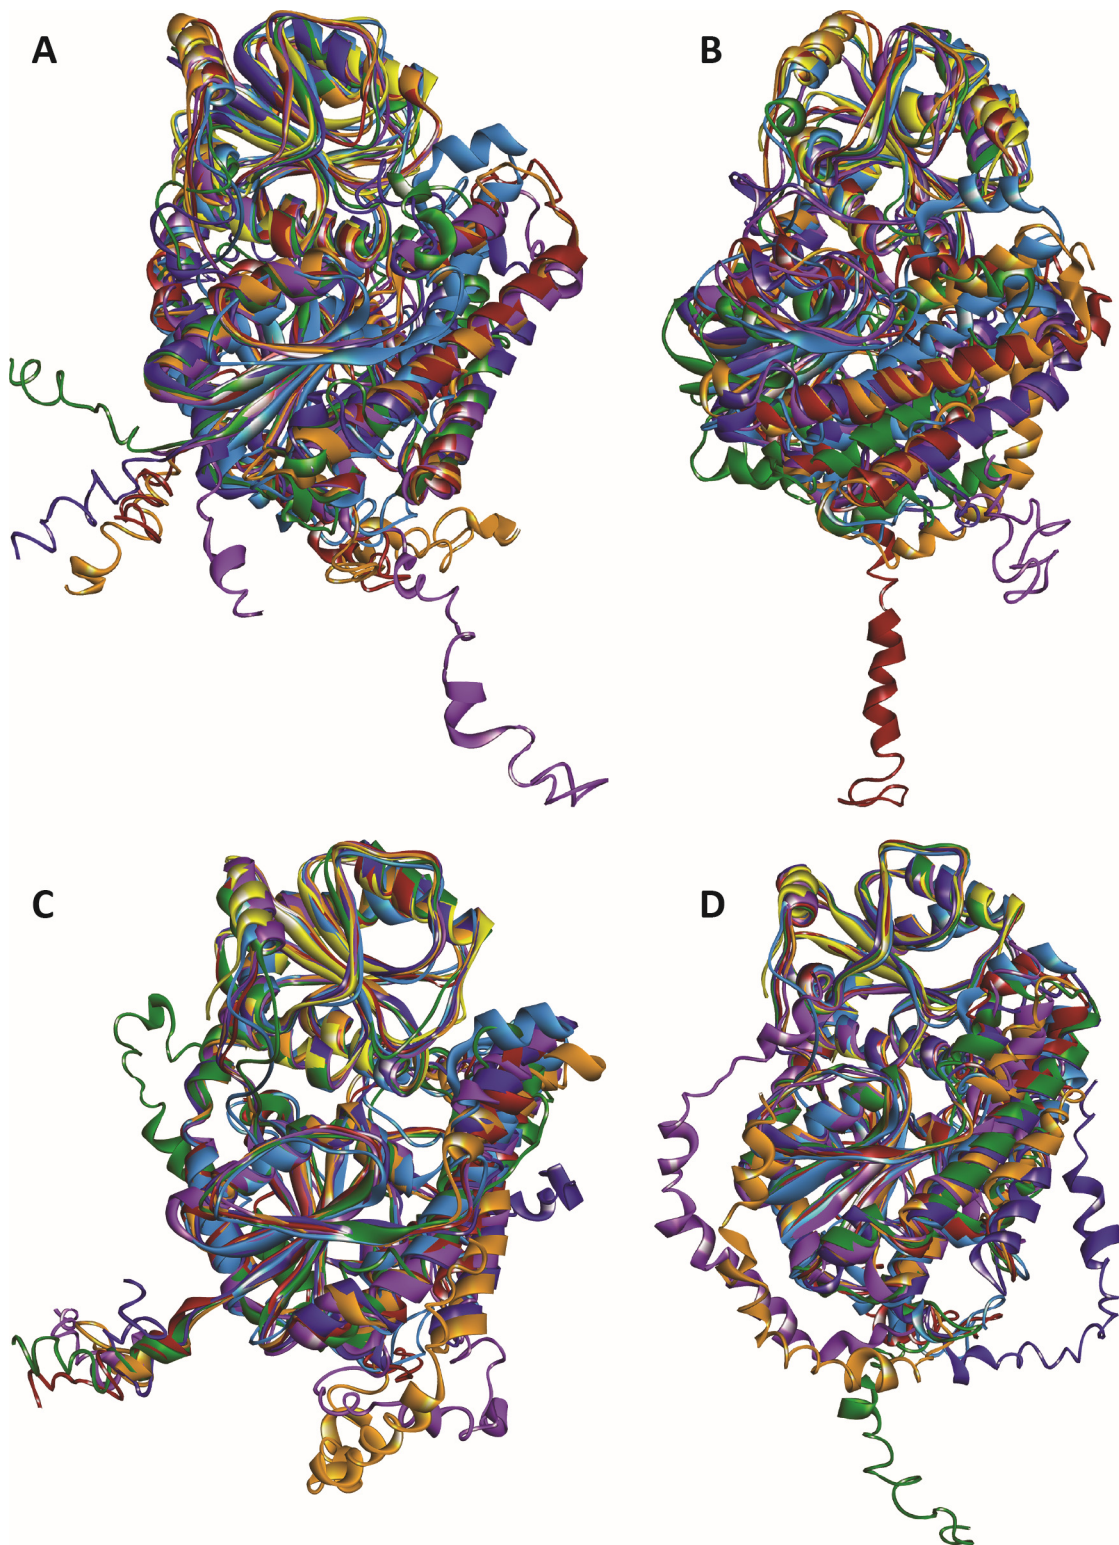

**Figure S1.** The 5 models produced by I-TASSER for each input condition are shown aligned with the UGT2B7 crystal structure (PDB 2O6L) in yellow, and the final UGT1A6 model in light blue. Model 1 is shown in red, model 2 in orange, model 3 in green, model 4 in blue, and model 5 in purple. A. Models generated with the signal peptide and without the UGT2B7 crystal structure as a guiding template (WSNT), B. Without the signal peptide, and without the UGT2B7 crystal structure (NSNT), C. With the signal peptide, and with the UGT2B7 crystal structure as a guide (WSWT), D. Without the signal peptide and with the UGT2B7 crystal structure as a guide (NSWT). Structural alignments in .mol2 format are in the “Supplemental structures” zip file (I-TASSER aligned models folder).

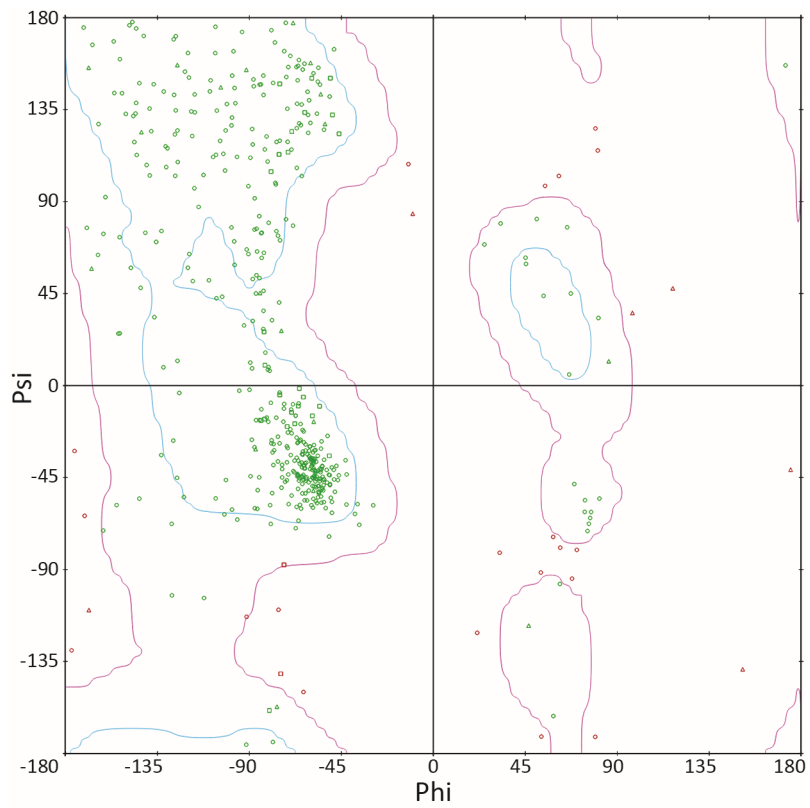

**Figure S2.** Ramachandran plot of the final UGT1A6 homology model.

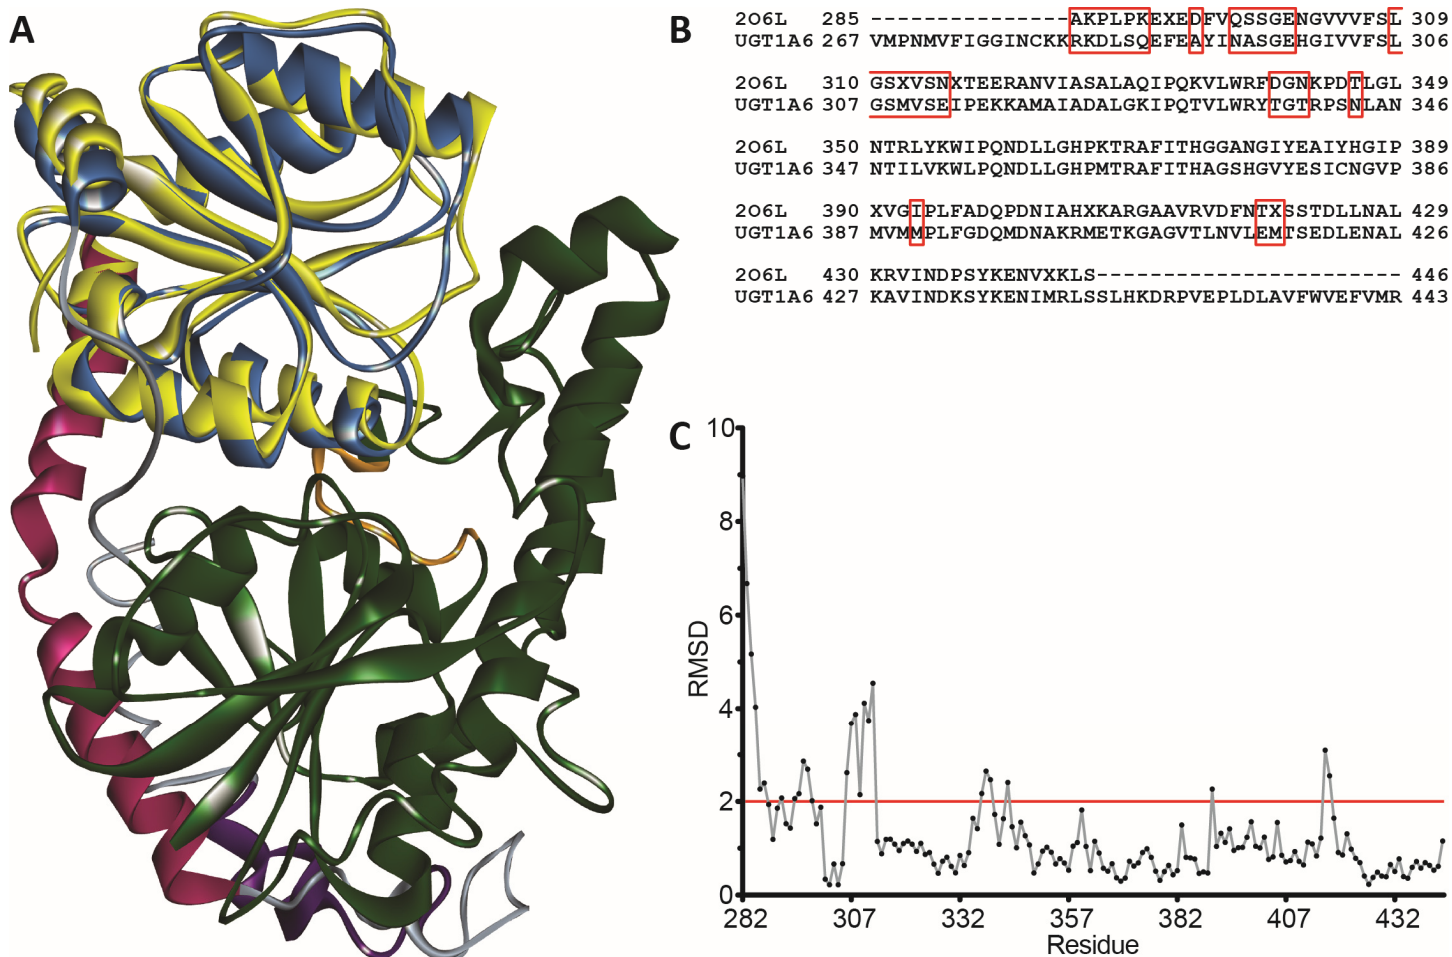

**Figure S3.** Alignment of the final UGT1A6 model with the template UGT2B7 crystal structure (2O6L). A. Final refined homology model of UGT1A6 with overlaid UGT2B7 crystal structure. Helices are shown as spirals, and  $\beta$ -sheets are shown as broad ribbons. The C-terminal domain (blue) is shown at the top, with the N-terminal domain (green) shown at the bottom of the image. The envelope helices (magenta) are shown to the left, with the transmembrane domain (purple) at the bottom. The putative dimerization domain (PDPVSYIPRCY) of UGT1A6 is highlighted in orange. The UGT2B7 crystal structure is shown in yellow. B. Protein sequence alignment of the aligned regions of the UGT1A6 model with UGT2B7 (2O6L) crystal structure. Residues with RMSDs differing by  $>2 \text{ \AA}$  are highlighted in red boxes. Amino acid 'X' in the 2O6L sequence correspond to selenomethionine. C. Graph of RMSD values over the length of the aligned proteins. The structural alignment can be found in the "supplemental structures" zip file, file UGT1A6\_2B7\_alignment.mol2.

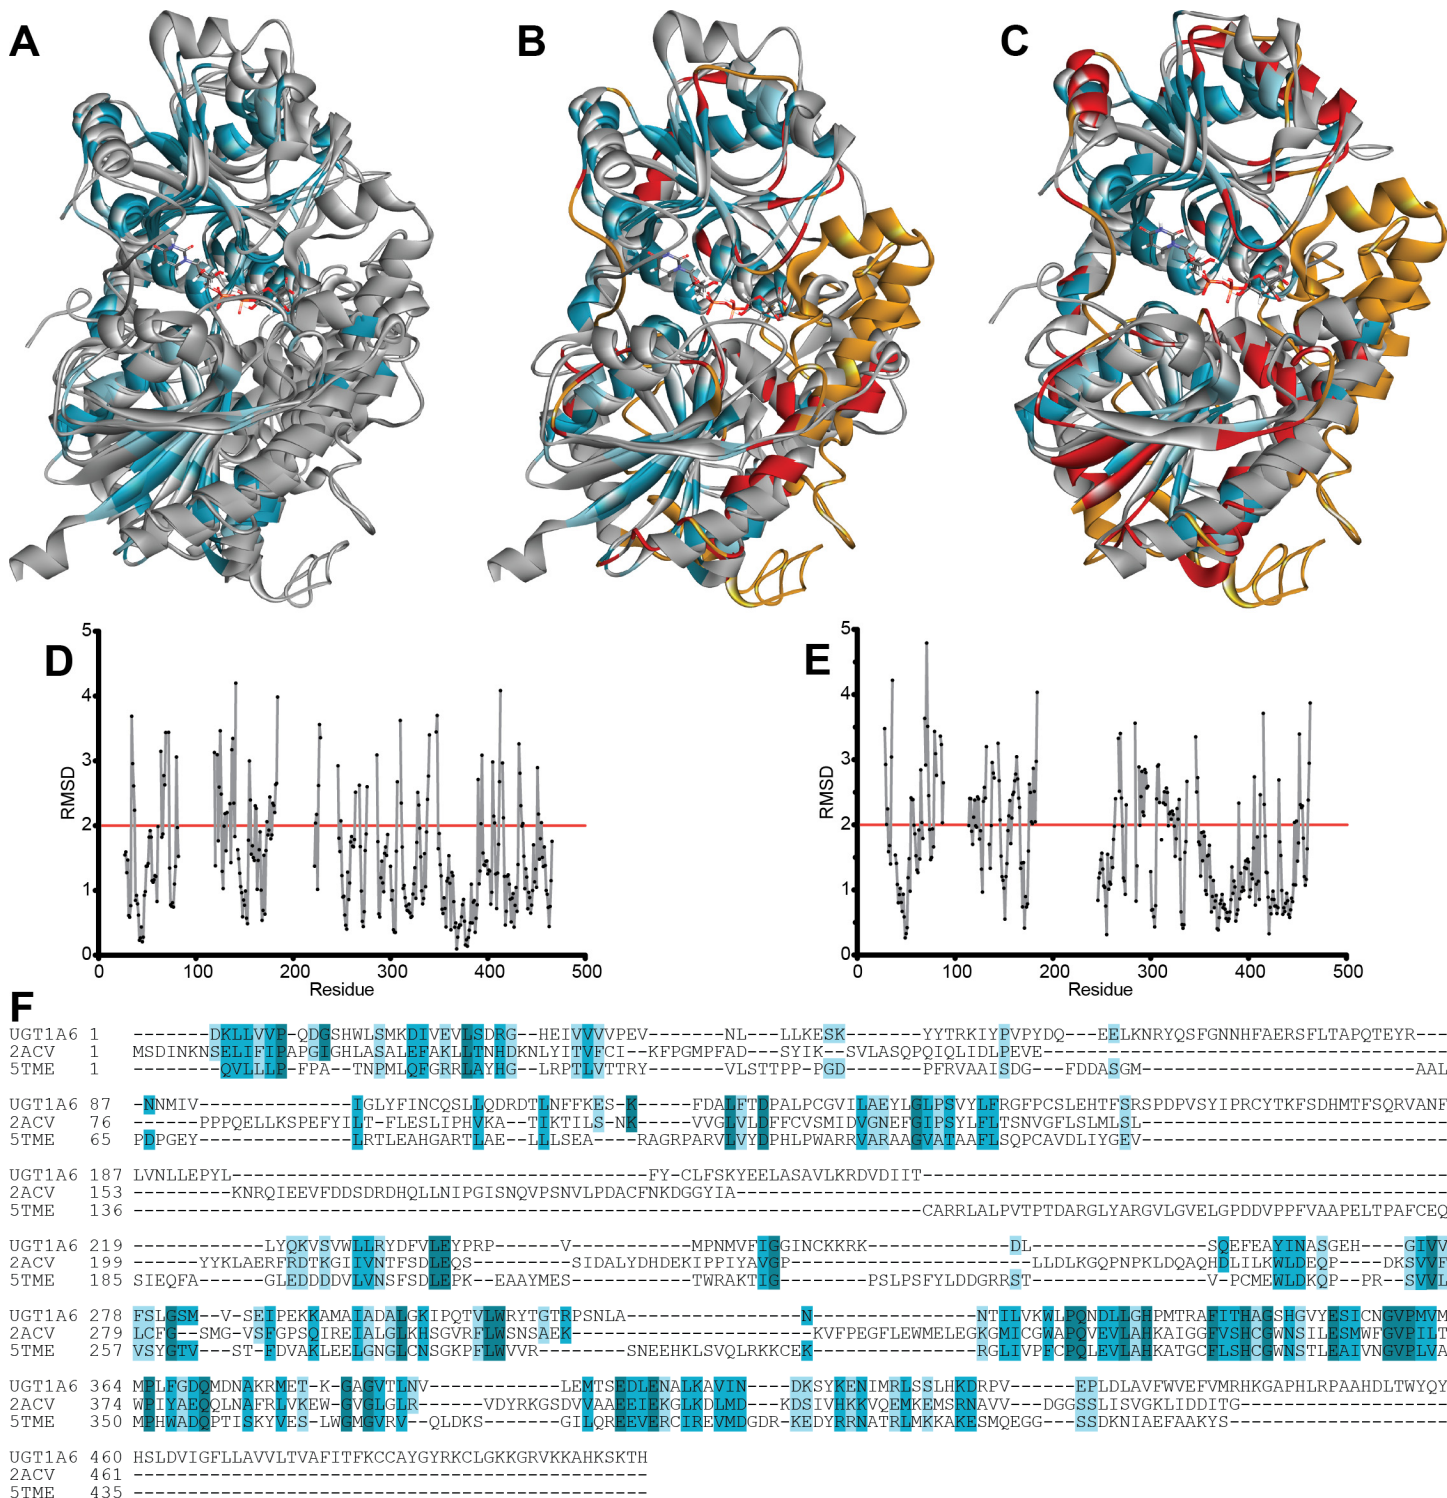

**Figure S4.** Structural alignments of the final UGT1A6 model with A. both 2ACV and 5TME GT structures, B. 2ACV alone, C. 5TME alone. Structures are coloured according to amino acid similarity: dark teal, identical; blue, strong similarity; cyan, weak similarity. Residues in red have RMSDs >2 Å, and residues in orange failed to align. UDPGA is shown in its binding site. D. Graph of RMSD values over the length of the aligned UGT1A6 and 2ACV amino acids. E. Graph of RMSD values over the length of the aligned UGT1A6 and 5TME amino acids. F. Sequence alignments generated from the superimposed protein structures. Amino acid similarity shading is as in A, strongly similar amino acids: STA, NEQK, NHQK, NDEQ, QHRK, MILV, MILF, HY, and FYW; weakly similar amino acids: CSA, ATV, SAG, STNK, STPA, SGND, SNDEQK, NDEQHK, NEQHRK, FVLIM, and HFY. The structural alignments between our UGT1A6 model and all GTs can be found in the “Supplemental structures” zip file, file UGT1A6\_all\_alignments.mol2.

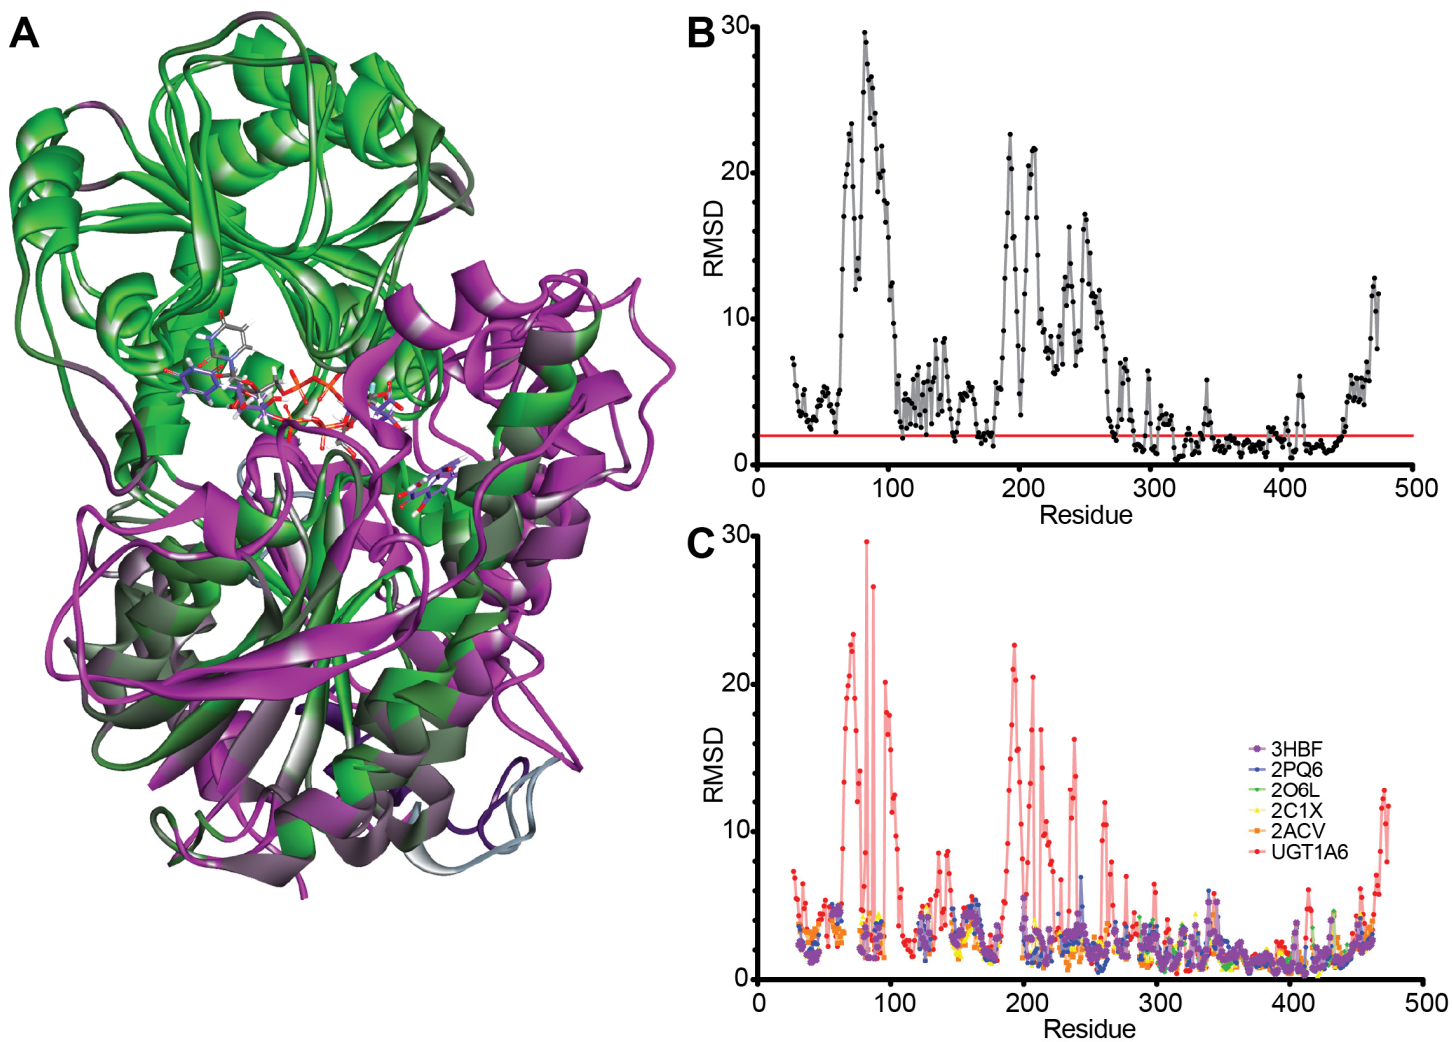

**Figure S5.** Comparison of our UGT1A6 model with that of Ghemtio *et al* (2014), which has been recapitulated from the coordinates supplied in that paper's supplementary information<sup>1</sup>. **A.** Structural overlay of both models, coloured by RMSD, with closely aligning regions in green, and more widely deviating regions in magenta. The co-substrates, UDPGA (our model) and U2F (Ghemtio *et al* model) are overlaid in the co-substrate binding region. Quercetin is shown in the substrate binding area in our model. **B.** Graph of RMSD values over the length of the aligned sequences. **C.** Graph of RMSD values for our UGT1A6 model, the Ghemtio *et al* model, and the 5 template structures used to create the Ghemtio *et al* model, over the length of alignment generated from the superimposed proteins.

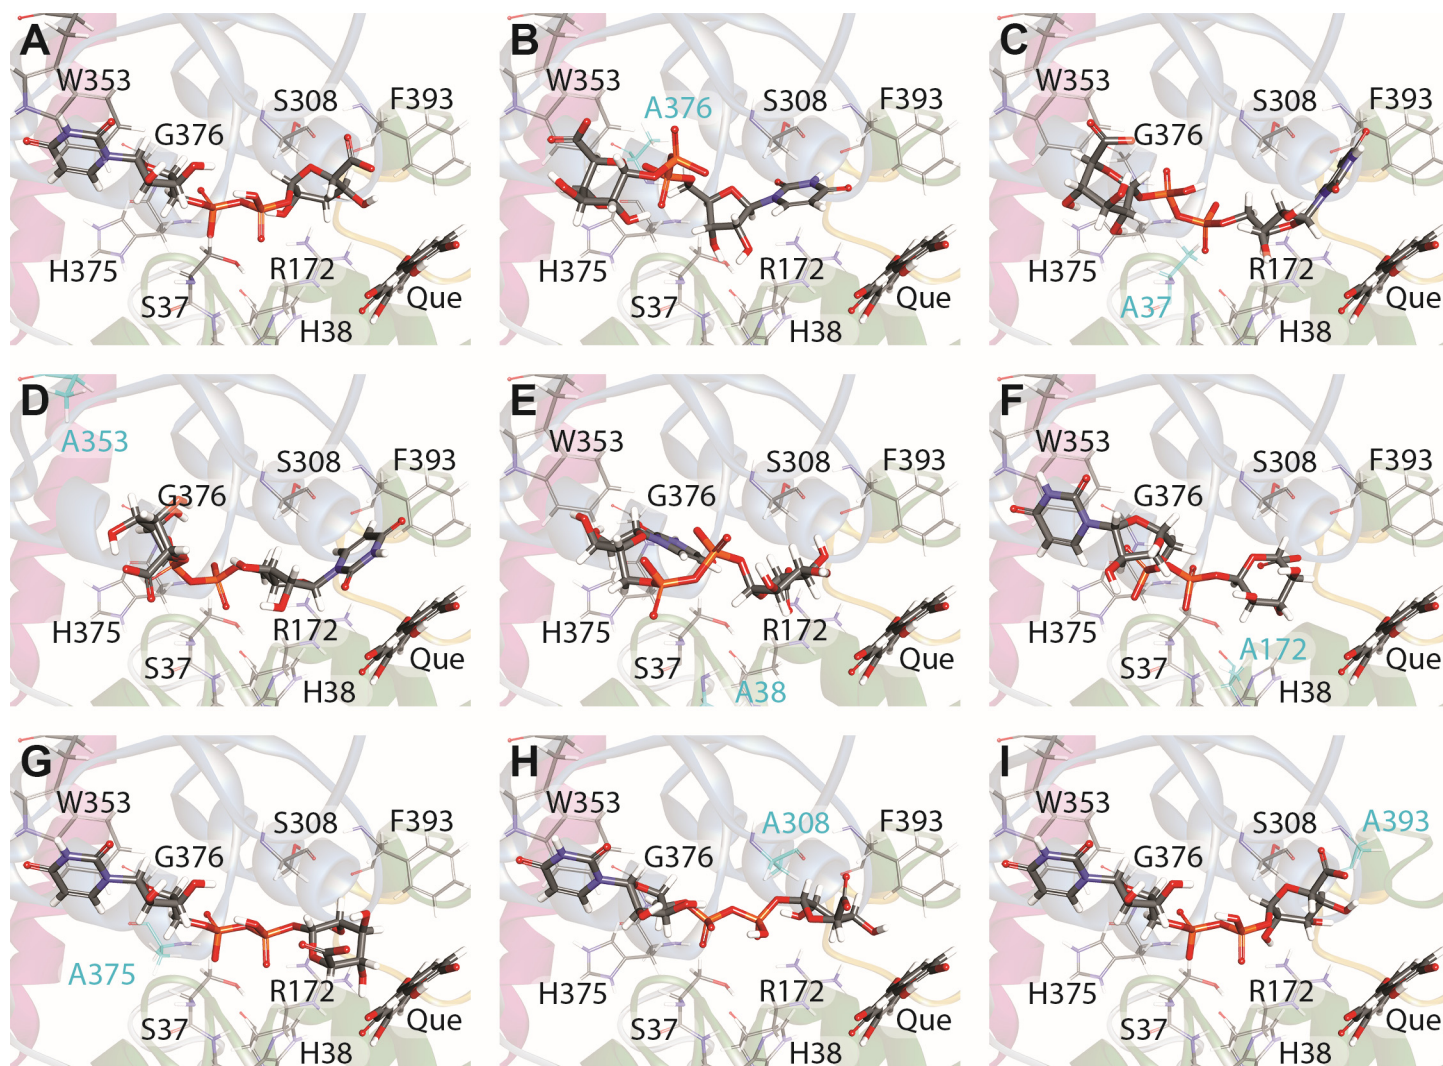

**Figure S6.** Comparison of UDPGA top docking positions into various mutated UGT1A6 models. Mutations are shown in order from most to least severe effect on UDPGA binding compared to the wild-type enzyme. A. Wild-type UGT1A6, B. G376A mutant, C. S37A mutant, D. W353A mutant, E. H38A mutant, F. R172A mutant, G. H375A mutant, H. S308A mutant, I. F393A mutant. Mutated residues are highlighted in cyan, quercetin (Que) is shown docked into the substrate binding site.

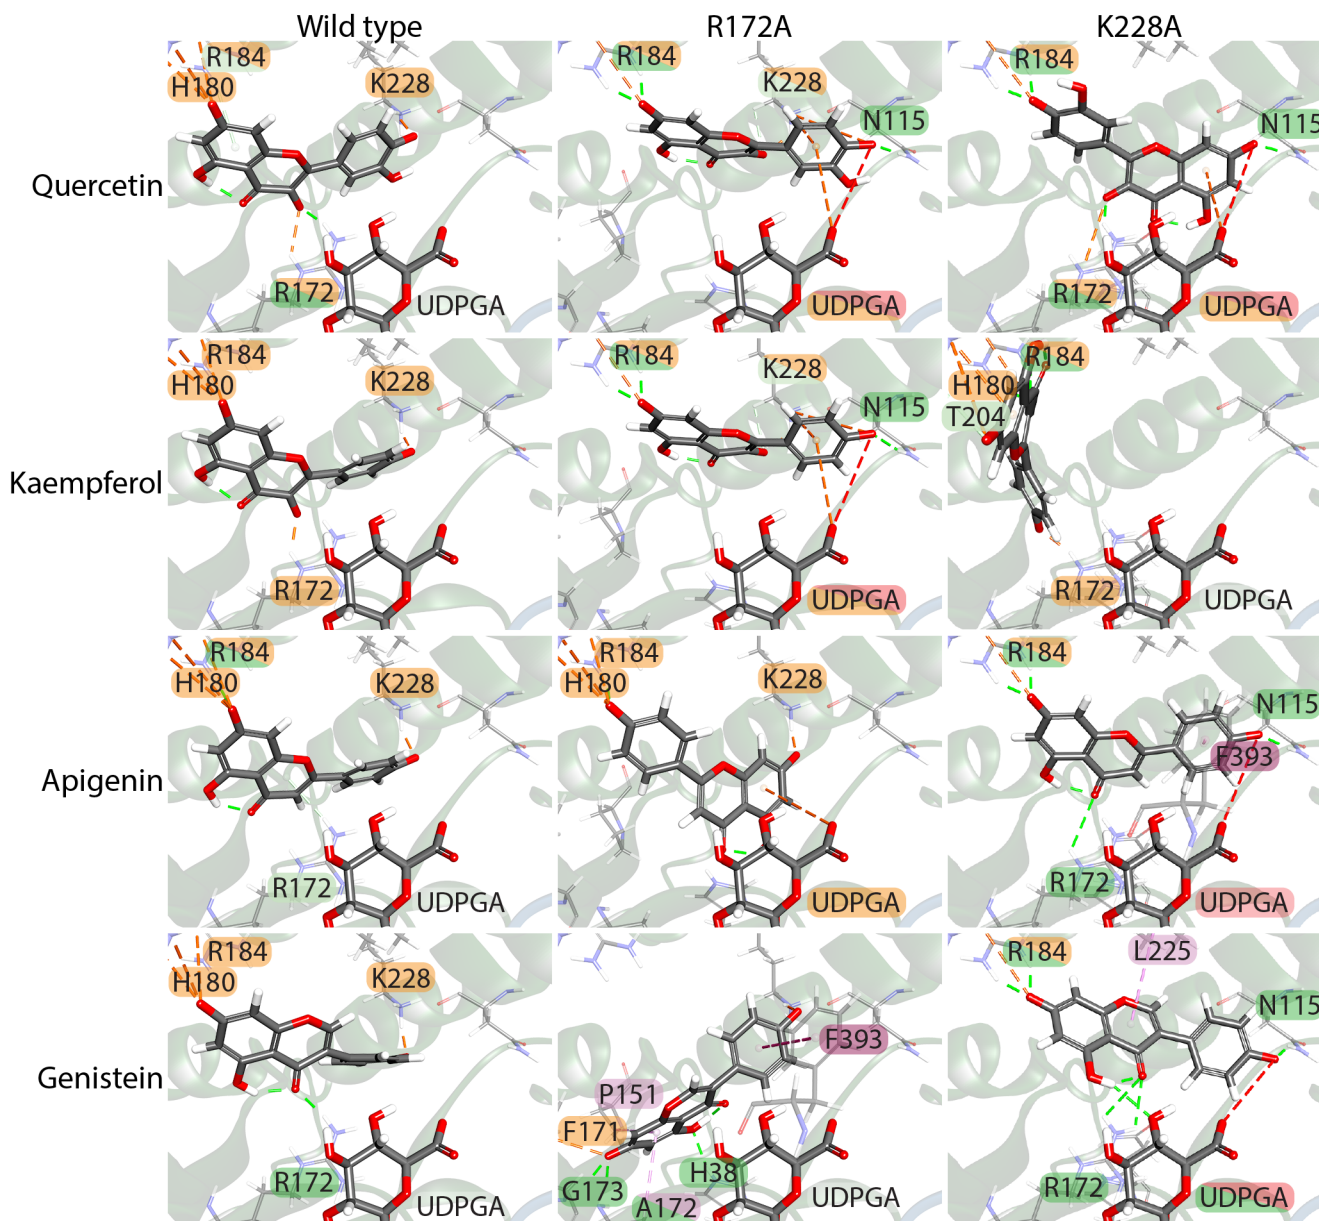

**Figure S7.** Comparison of the docking of selected substrates into the wildtype and mutated UGT1A6 model. The observed interactions for each docked compound are indicated. Interactions are coloured according to type with electrostatic interactions shown in orange, classical hydrogen bonds in dark green, non-classical hydrogen bonds in pale green,  $\pi$ - $\pi$  stacking interactions in dark pink,  $\pi$ -alkyl interactions in light pink, and unfavourable interactions in red. Residues with multiple colours had multiple different interactions with the substrate.



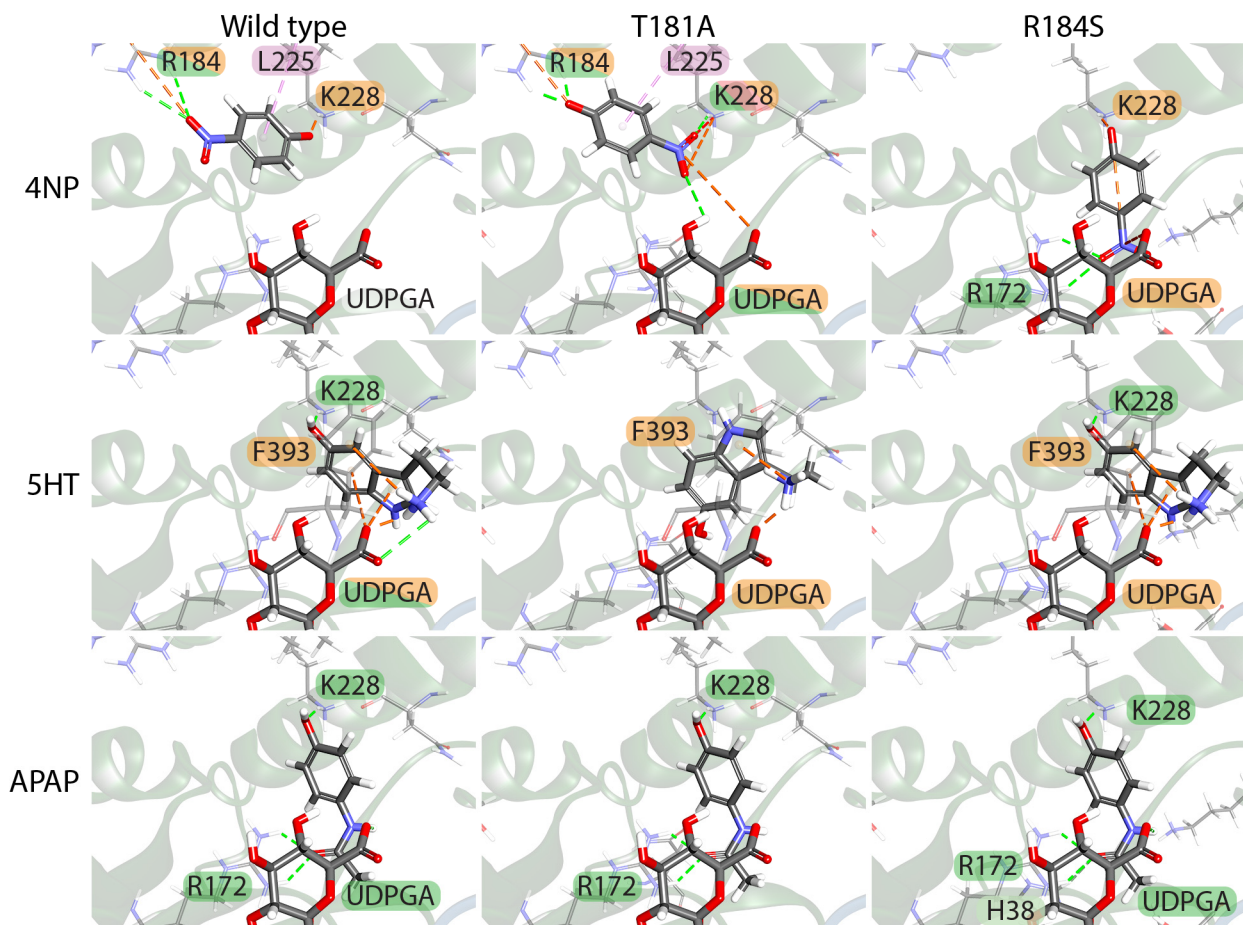

**Figure S8.** Comparison of the docking of three small planar phenolic compounds into two mutations that contribute to several UGT1A6 polymorphisms. The observed interactions for each docked compound are indicated, and coloured as in Figure S7. 4NP, 4-Nitrophenol; 5HT, serotonin; APAP, acetaminophen.

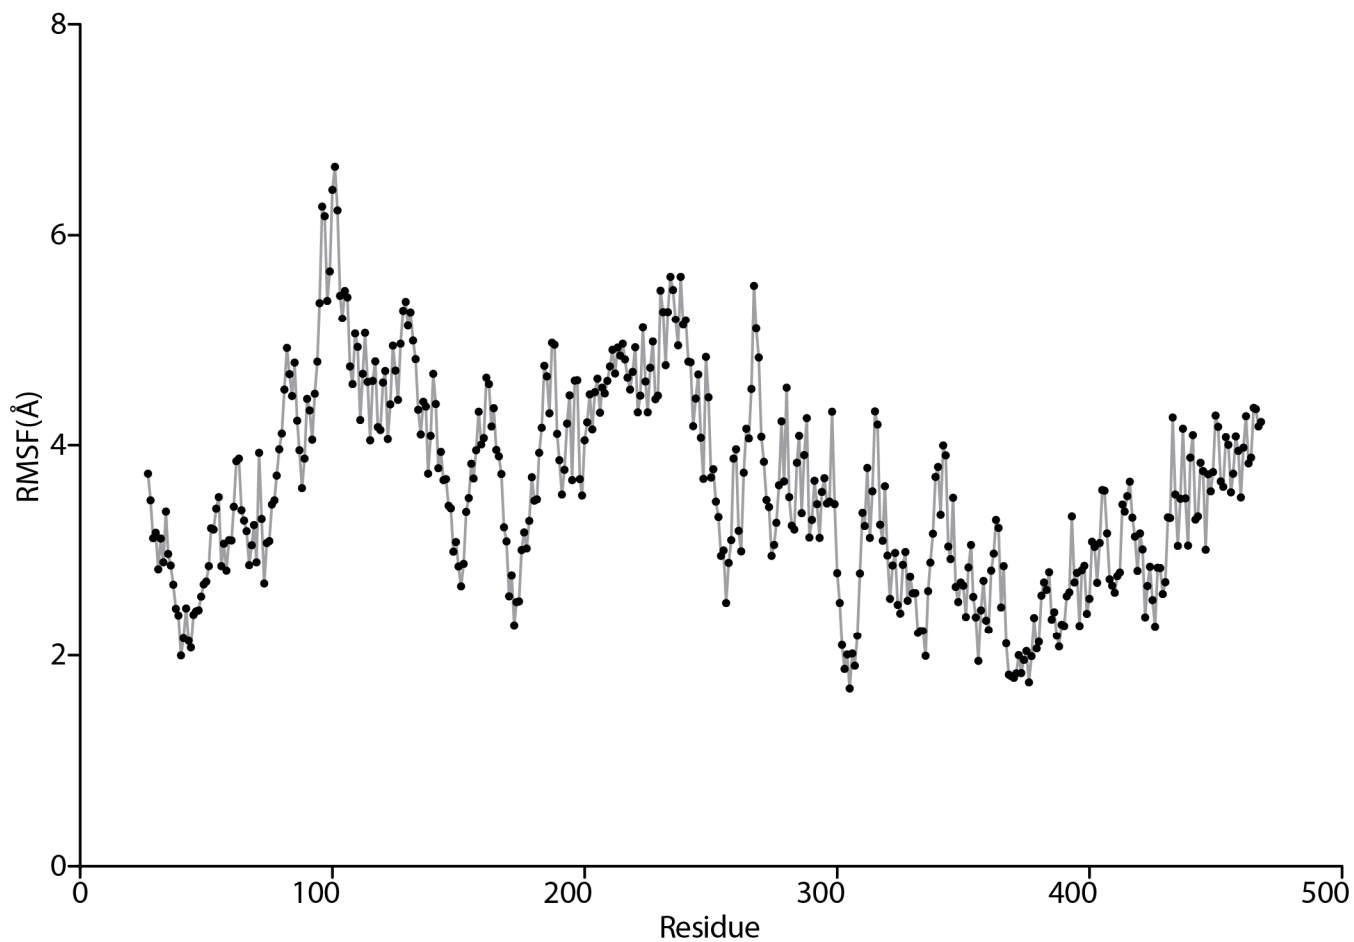

**Figure S9.** Root mean square fluctuation (RMSF) for each residue over the course of the molecular dynamics simulation.

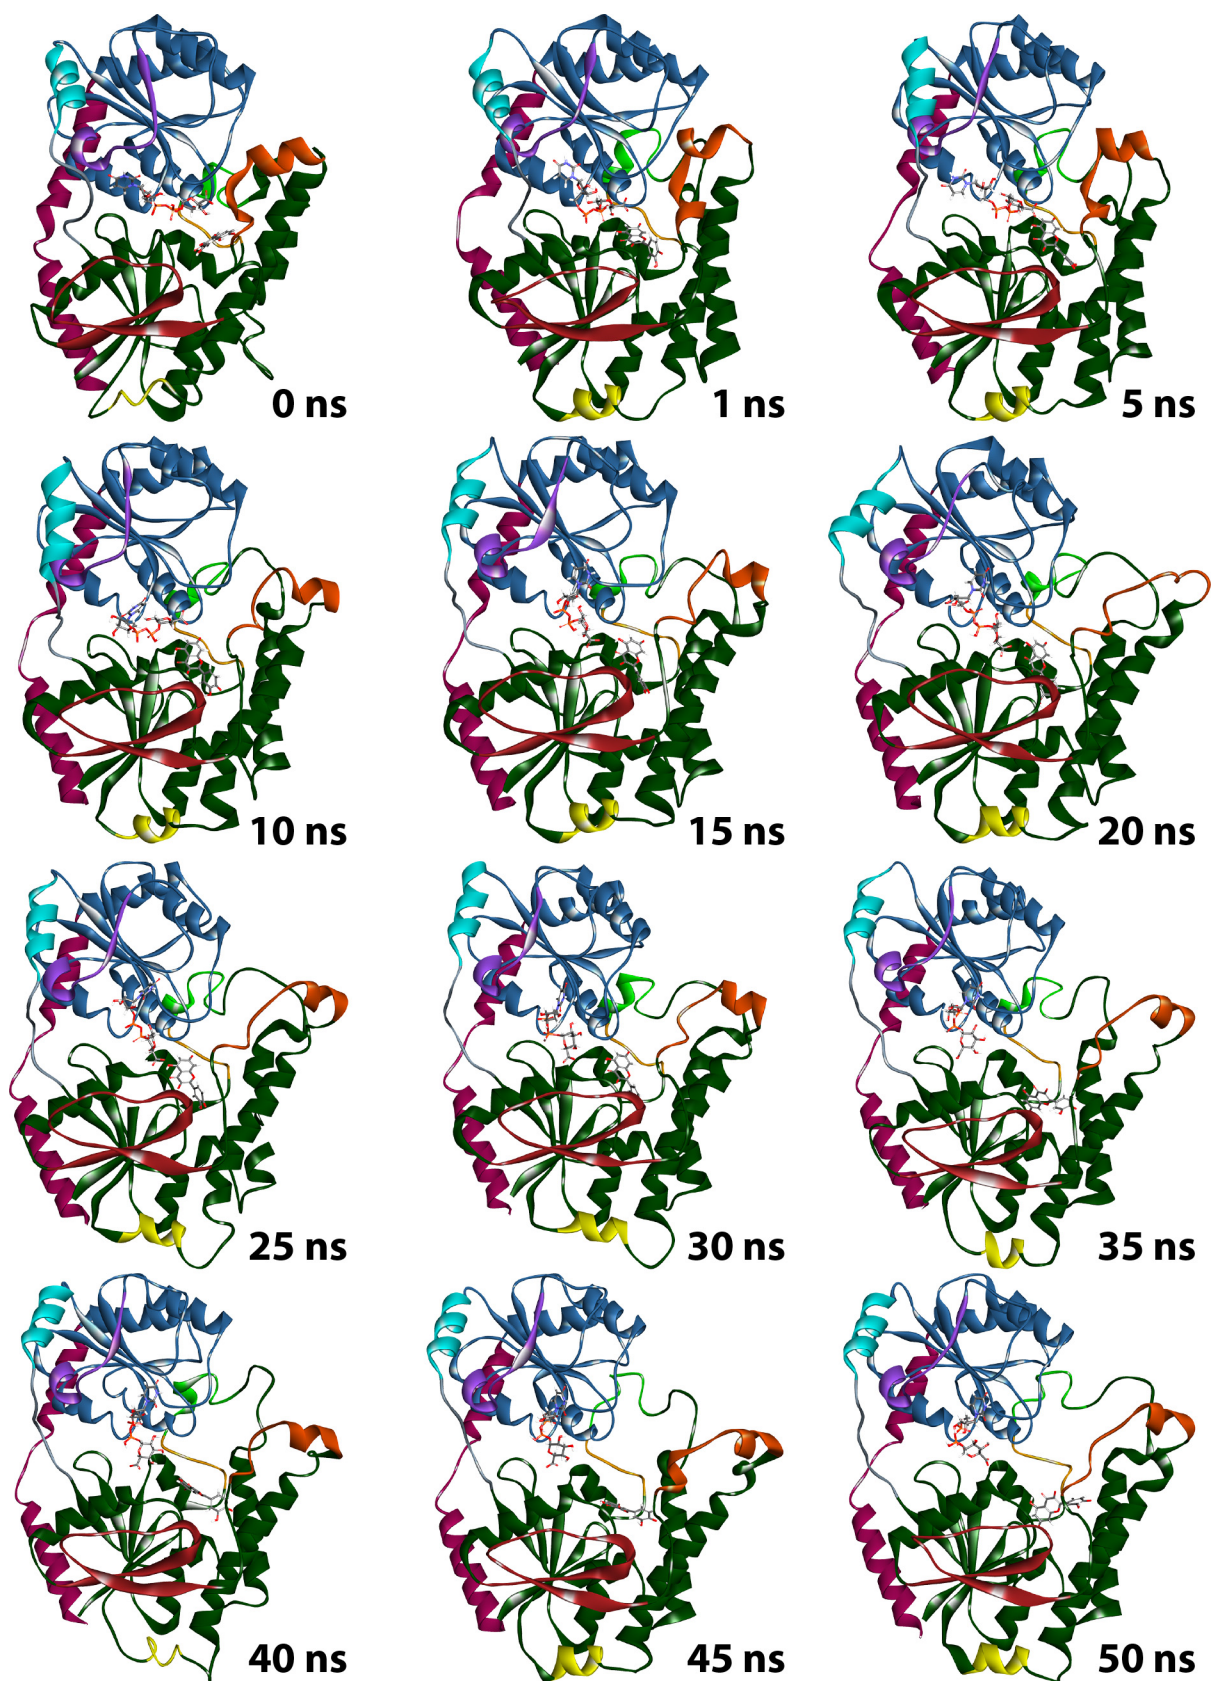

**Figure S10.** Snapshots from the molecular dynamics simulation trajectory. The cartoon diagram is coloured as in Figure S3, with the helices and sheets that showed substantial differences coloured separately. The bound UDPGA co-substrate, and bound substrate quercetin are shown as sticks. N $\beta$ 2, N $\alpha$ 2, and N $\beta$ 3 are shown in red, N $\alpha$ 3-1 in bright orange, N $\alpha$ 3-3 in yellow, N $\alpha$ 5-2 in bright green, C $\alpha$ 0 in teal, and C $\beta$ 3 – C $\alpha$ 3 in purple.

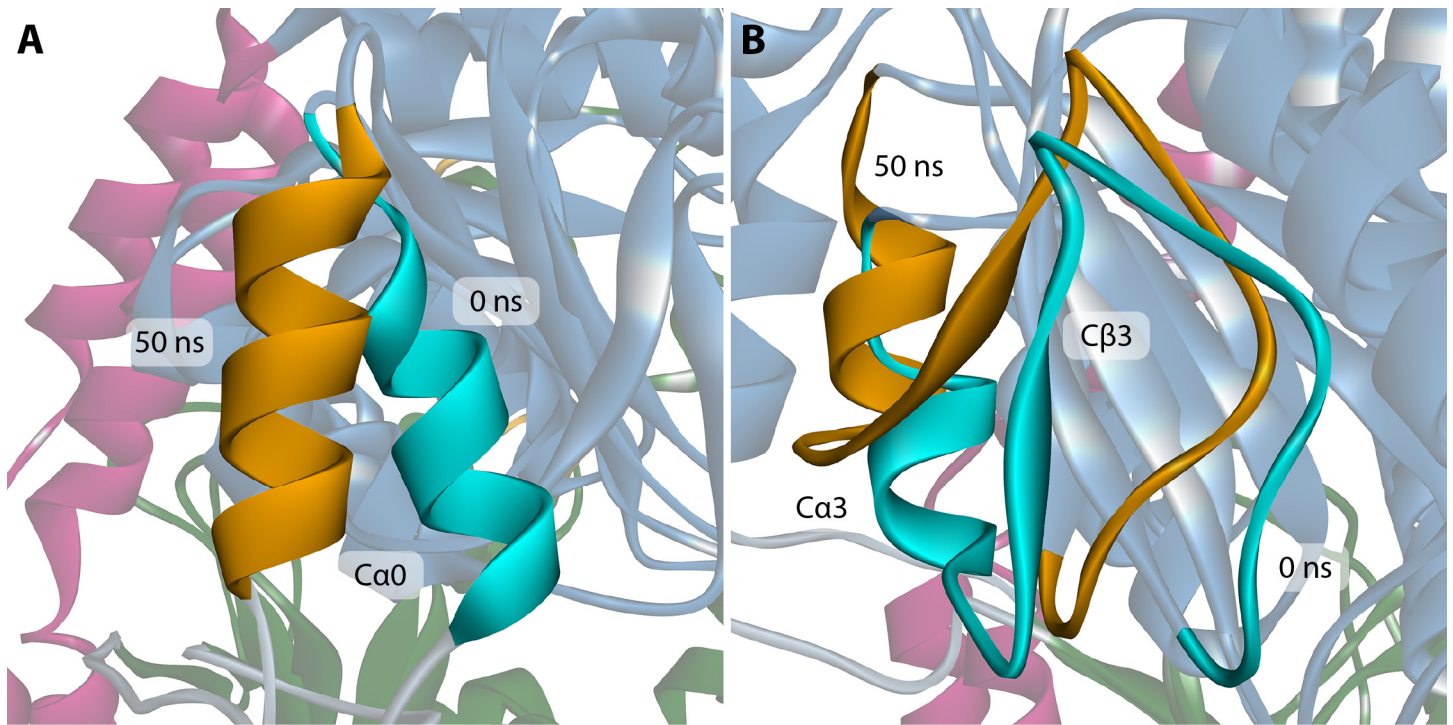

**Figure S11.** Shifts in the CTD following 20 ns of simulation compared to the initial structure. The initial (0 ns) structure is overlaid with the structure after 50 ns of simulation time. A. Shifts in the Ca0 helix. B. Shifts in the Cβ3 sheet and Ca3 helix. The shifted residues are highlighted in teal (0 ns) and orange (50 ns).

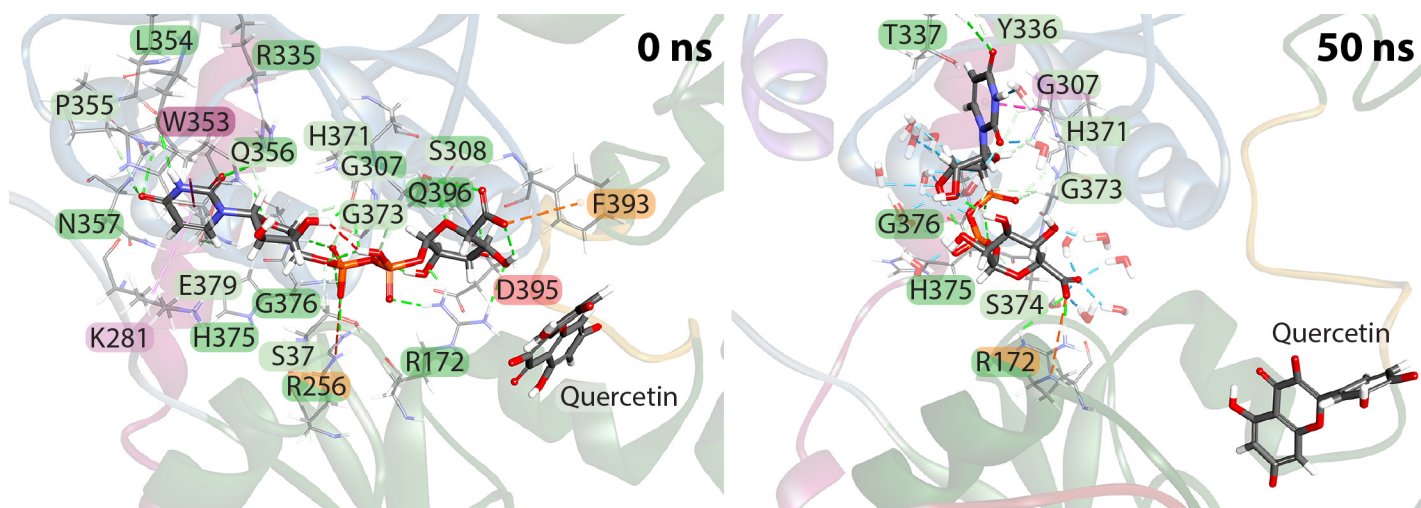

**Figure S12.** Changes in the UDPGA-UGT1A6 interacting residues following 50 ns of molecular dynamics simulations. Interacting residues are coloured as in Figure S7.

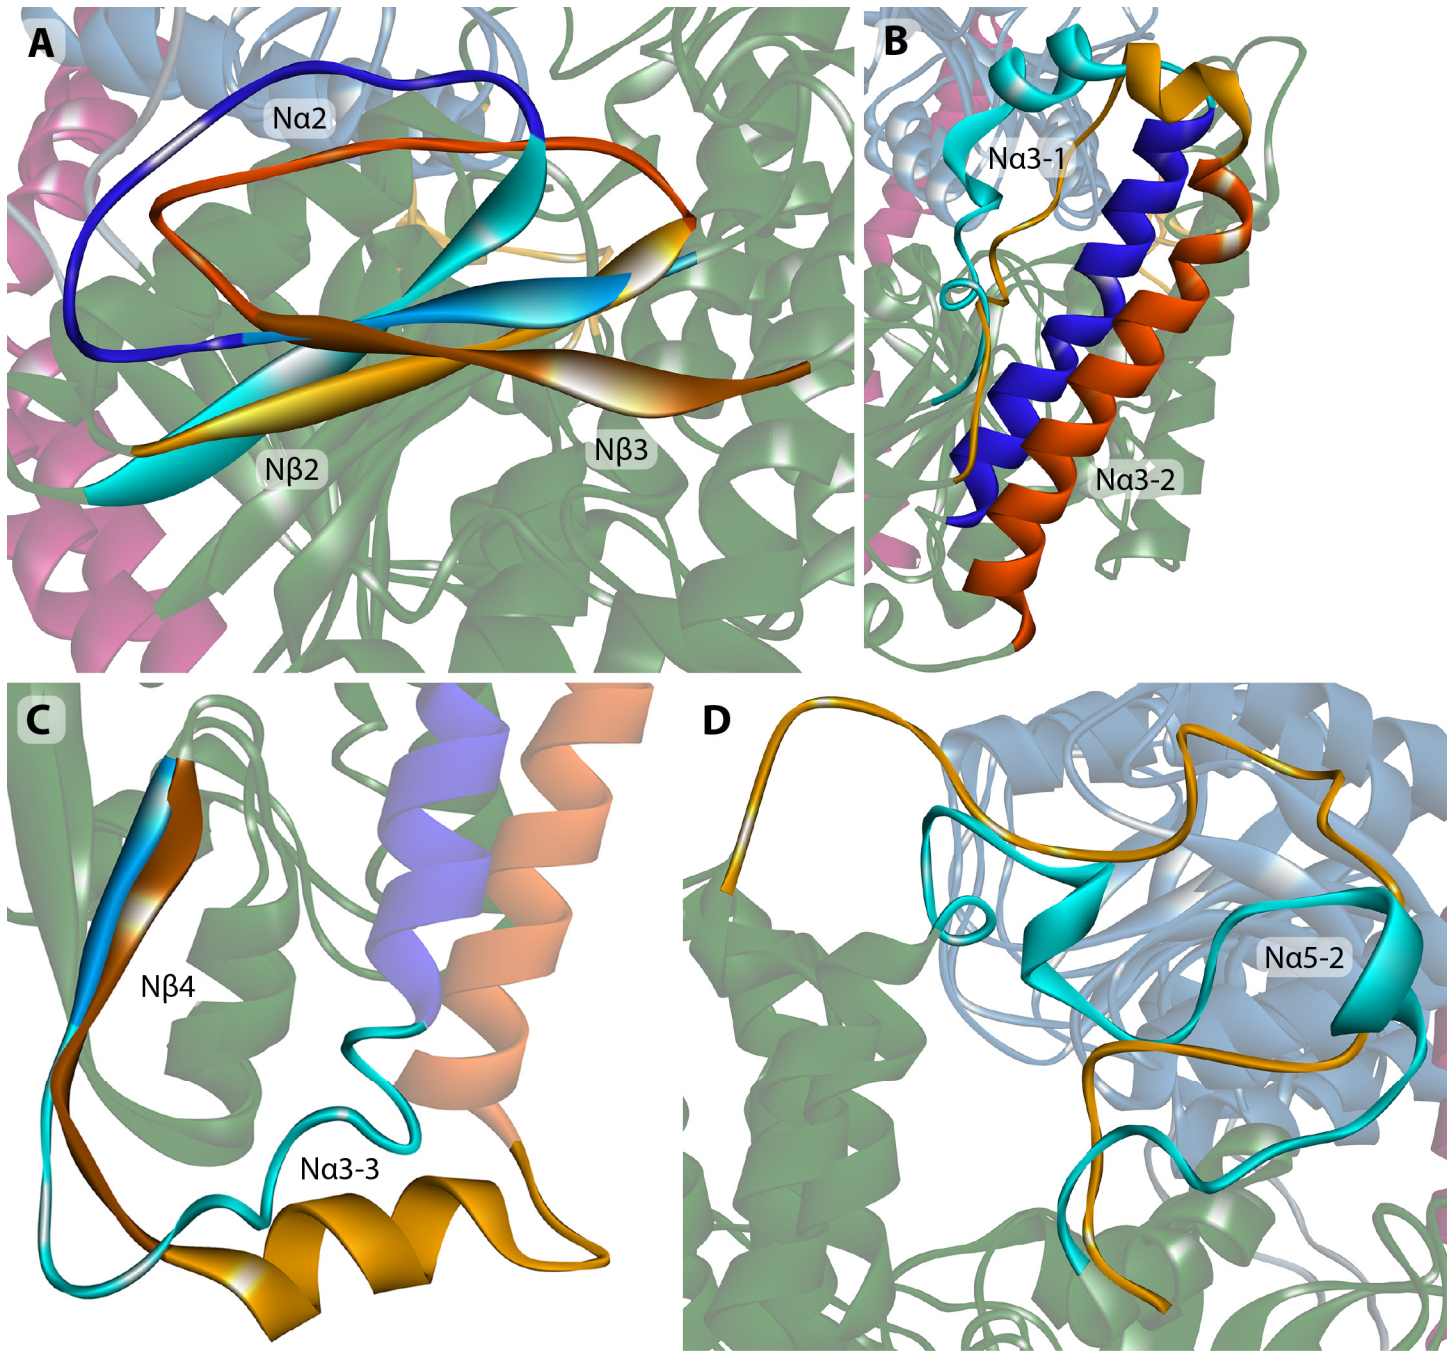

**Figure S13.** Shifts in the NTD following 50 ns of simulation. The initial (0 ns) structure is overlaid with the structure after 50 ns of simulation time. Secondary structures are highlighted using blues for the 0 ns time point, and oranges for the 50 ns snapshot. A. Shift in the  $N\beta 2$  (teal or orange),  $N\alpha 2$  (royal blue and bright orange), and  $N\beta 3$  region (cornflower blue and dark orange). B. Shifts in the  $N\alpha 3-1$  and  $N\alpha 3-2$  regions. C. Shifts in the  $N\alpha 3-3$  (teal or orange) and  $N\beta 4$  region (cornflower blue or dark orange). D. Shifts in the  $N\alpha 5-2$  region.

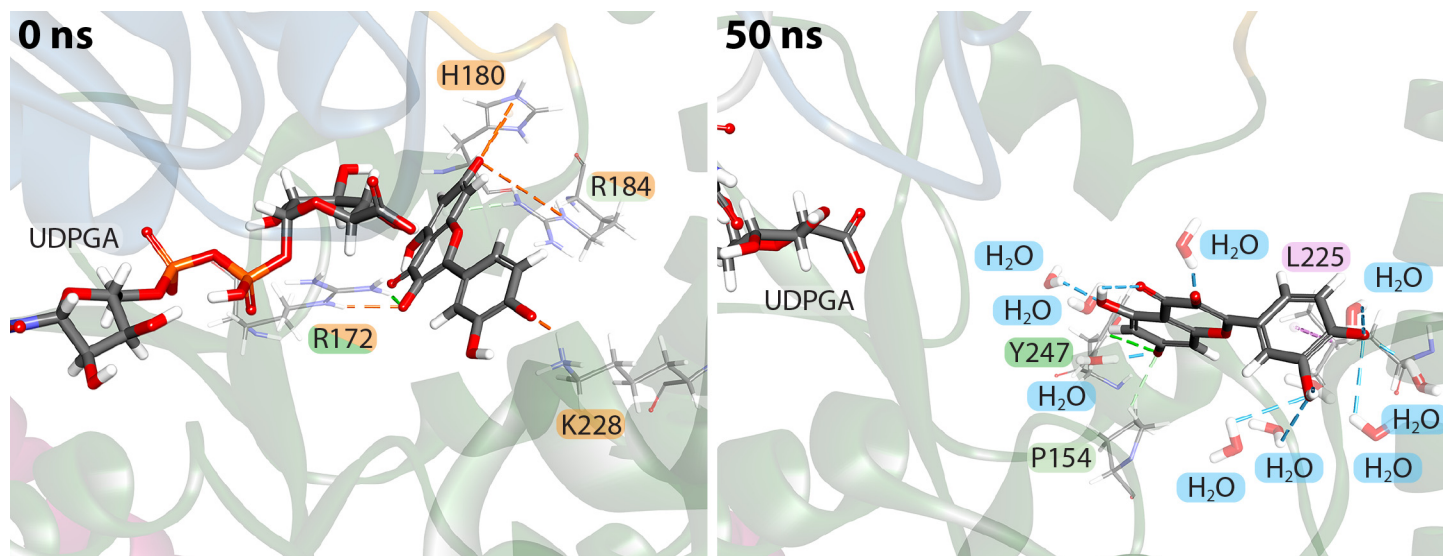

**Figure S14.** Changes in the quercetin-UGT1A6 interacting residues following 50 ns of molecular dynamics simulations. Interacting residues are coloured as in Figure S7, water-hydrogen bonds are shown in blue.

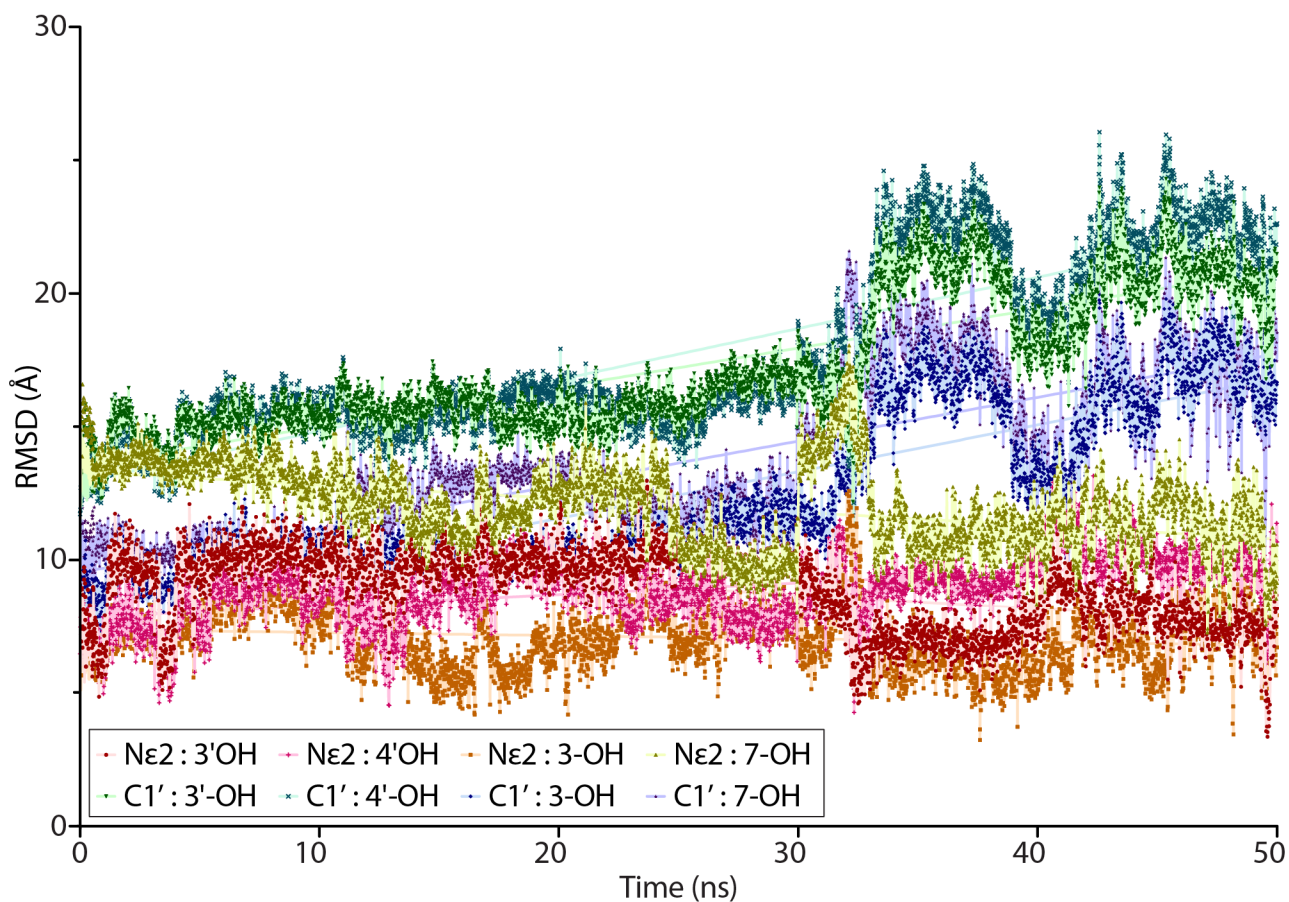

**Figure S15.** Distances between the Nε2 group of the catalytic H38, the glucuronic acid C1', and the potentially glucuronidated hydroxyl groups of the bound quercetin ligand over 50 ns of molecular dynamics simulations. Distances between the 3'-OH and Nε2 are shown in red, and with the C1' in green; distances between the 4'-OH and Nε2 in pink, and C1' in cyan; distance between the 3-OH and Nε2 in orange, and C1' in blue; and the distance between the 7-OH and Nε2 in yellow, and C1' in purple.



**Table S1.** Confidence scores for each model produced by I-TASSER

| Input | Model # | C-Score <sup>a</sup> | Est. TM-Score <sup>b</sup> | Est<br>RMSD (Å) <sup>c</sup> | No. of<br>decoys <sup>e</sup> | Cluster<br>density <sup>f</sup> |
|-------|---------|----------------------|----------------------------|------------------------------|-------------------------------|---------------------------------|
| WSNT  | 1       | -1.65                | 0.51 ± 0.15                | 11.4 ± 4.5                   | 910                           | 0.0591                          |
|       | 2       | -2.53                |                            |                              | 456                           | 0.0247                          |
|       | 3       | -2.56                |                            |                              | 422                           | 0.0239                          |
|       | 4       | -2.6                 |                            |                              | 340                           | 0.0229                          |
|       | 5       | -3.07                |                            |                              | 194                           | 0.0144                          |
| NSNT  | 1       | -1.67                | 0.51 ± 0.15                | 11.3 ± 4.5                   | 805                           | 0.0575                          |
|       | 2       | -1.49 <sup>g</sup>   |                            |                              | 630                           | 0.0691                          |
|       | 3       | -1.95                |                            |                              | 600                           | 0.0436                          |
|       | 4       | -2.64                |                            |                              | 291                           | 0.0218                          |
|       | 5       | -3.32                |                            |                              | 180                           | 0.011                           |
| WSWT  | 1       | -2.29                | 0.45 ± 0.14                | 13.0 ± 4.2                   | 1169                          | 0.0277                          |
|       | 2       | -3.06                |                            |                              | 494                           | 0.0128                          |
|       | 3       | -3.09                |                            |                              | 493                           | 0.0124                          |
|       | 4       | -3.05                |                            |                              | 470                           | 0.013                           |
|       | 5       | -3.73                |                            |                              | 268                           | 0.0065                          |
| NSWT  | 1       | -1.65                | 0.51 ± 0.15                | 11.2 ± 4.6                   | 2262                          | 0.0518                          |
|       | 2       | -3.04                |                            |                              | 597                           | 0.0129                          |
|       | 3       | -3.22                |                            |                              | 483                           | 0.0108                          |
|       | 4       | -3.13                |                            |                              | 463                           | 0.0118                          |
|       | 5       | -3.33                |                            |                              | 450                           | 0.0097                          |

<sup>a</sup> C-scores can range from -5 to 2, with higher values indicating higher confidence; <sup>b</sup> I-TASSER only provides TM-scores for the top ranked model, scores >0.5 indicating a model of correct topology and scores <0.17 meaning random similarity; <sup>c</sup> RMSD scores are only provided for the top ranked model, with local errors; <sup>d</sup> the number of low-temperature model replicas generated by excising continuous fragments from the threading alignments and reassembly through replica-exchanged Monte Carlo simulations; <sup>e</sup> the number of structure decoys at a unit of space in the SPICKER cluster, higher cluster density signifies a higher quality model with the structure occurring more frequently in the simulation; <sup>f</sup> models are ranked by cluster size, and although lower ranked models occasionally have higher C-scores, the top ranked model is usually better.

**Table S2.** DOPE and verify protein scores for I-TASSER produced models

| Model | DOPE score | Normalized DOPE score* | Verify score | Verify expected high score | Verify expected low score |
|-------|------------|------------------------|--------------|----------------------------|---------------------------|
| WSNT  | -60317.38  | -0.00                  | 158.84       | 243.19                     | 109.44                    |
| NSNT  | -58504.77  | -0.33                  | 144.49       | 231.22                     | 104.05                    |
| WSWT  | -63160.52  | -0.38                  | 160.52       | 243.19                     | 109.44                    |
| NSWT  | -60440.23  | -0.60                  | 173.76       | 231.22                     | 104.05                    |
| 2O6L  | -37114.25  | -1.99                  | 161.43       | 149.36                     | 67.21                     |
| 2ACW  | -63436.67  | -2.12                  | 256.69       | 210.496                    | 94.7231                   |

\*This is a Z-score derived from the DOPE score that accounts for protein size.

**Table S3.** Root Mean Square Distances (RMSD) between UGT1A6 models and GT crystal structures

| <b>Structure</b> | <b>WSNT (Å)</b> | <b>NSNT (Å)</b> | <b>WSWT (Å)</b> | <b>NSWT (Å)</b> |
|------------------|-----------------|-----------------|-----------------|-----------------|
| 1IIR             | 1.944           | 1.739           | 1.588           | 1.59            |
| 1PN3             | 2.331           | 2.164           | 1.807           | 1.782           |
| 1PNV             | 2.304           | 2.135           | 1.822           | 1.799           |
| 1RRV             | 2.102           | 1.942           | 1.477           | 1.491           |
| 2ACV             | 1.487           | 1.504           | 1.36            | 1.497           |
| 2ACW             | 1.463           | 1.484           | 1.365           | 1.457           |
| 2C9Z             | 1.605           | 1.625           | 1.608           | 1.65            |
| 2IYA             | 2.061           | 1.901           | 1.743           | 1.763           |
| 2O6L             | 1.283           | 1.318           | 0.841           | 0.793           |
| 2P6P             | 2.014           | 1.834           | 1.705           | 1.68            |
| 2PQ6             | 1.426           | 1.42            | 1.991           | 1.904           |
| 2VCE             | 1.601           | 1.617           | 1.904           | 1.828           |
| 2VCH             | 1.625           | 1.641           | 2.017           | 1.907           |
| 2VG8             | 1.605           | 1.622           | 2.027           | 1.919           |
| 3DOR             | 2.075           | 1.867           | 2.14            | 2.133           |
| 3H4I             | 2.412           | 2.226           | 1.839           | 1.86            |
| 3H4T             | 2.421           | 2.236           | 1.844           | 1.869           |
| 3HBF             | 1.446           | 1.467           | 1.868           | 2.03            |
| 3HBJ             | 1.452           | 1.464           | 1.915           | 2.103           |
| 3IA7             | 2.311           | 2.233           | 2.006           | 2.01            |
| 3OTG             | 1.984           | 1.866           | 1.489           | 1.452           |
| 3OTH             | 2.007           | 1.877           | 1.508           | 1.47            |
| 3RSC             | 1.95            | 1.786           | 1.713           | 1.695           |
| 3WC4             | 1.325           | 1.316           | 1.783           | 1.981           |
| 4REL             | 1.323           | 1.316           | 1.747           | 1.945           |
| 4REM             | 1.341           | 1.332           | 1.685           | 1.831           |
| 4WHM             | 1.313           | 1.306           | 1.628           | 1.737           |
| 5TMB             | 1.368           | 1.401           | 1.798           | 1.726           |
| 5TME             | 1.41            | 1.431           | 1.858           | 1.756           |
| 5U6M             | 1.415           | 1.436           | 1.586           | 1.549           |
| WSNT             |                 | 1.283           | 1.182           | 1.111           |
| NSNT             |                 |                 | 1.247           | 1.168           |
| WSWT             |                 |                 |                 | 1.338           |

**Table S4.** Residues important for co-substrate binding in multiple GT structures

| UDPGA moiety    | UGT1A6 Residue | Crystal structure (bound co-substrate) |            |            |             |             |            |            |            |            |            |            |            |            |            |            |            |            |            |            |            |            |            |            |            |
|-----------------|----------------|----------------------------------------|------------|------------|-------------|-------------|------------|------------|------------|------------|------------|------------|------------|------------|------------|------------|------------|------------|------------|------------|------------|------------|------------|------------|------------|
|                 |                | 2C1Z (U2F)                             | 2VCE (U2F) | 3H4I (U2F) | 2ACW (UDPG) | 5GL5 (UDPG) | 2ACV (UDP) | 2C1X (UDP) | 2C9Z (UDP) | 2IYA (UDP) | 2VCH (UDP) | 2VG8 (UDP) | 3H4T (UDP) | 3HBF (UDP) | 3HBJ (UDP) | 4WHM (UDP) | 5TMB (UDP) | 5TME (UDP) | 5U6M (UDP) | 1PN3 (TYD) | 1PNV (TYD) | 1RRV (TYD) | 3OTG (TYD) | 3OTH (TYD) | 3RSC (TYD) |
| Glucose         | G36*           |                                        |            | S10        |             |             |            |            |            |            |            |            |            |            |            |            |            |            |            |            |            |            |            |            |            |
| Glucose         | H38*           | H20                                    |            | D13        |             | D752        |            |            |            |            |            |            |            |            |            |            |            |            |            |            |            |            |            |            |            |
| Glucose         | R172*          | T141                                   |            |            |             |             |            |            |            |            |            |            |            |            |            |            |            |            |            |            |            |            |            |            |            |
| Glucose         | S374           | W353                                   | W367       | A294       | W360        | S1072       |            |            |            |            |            |            |            |            |            |            |            |            |            |            |            |            |            |            |            |
| Glucose         | D395           | D374                                   | E388       | D315       | E381        | D1093       |            |            |            |            |            |            |            |            |            |            |            |            |            |            |            |            |            |            |            |
| Glucose         | Q396           | Q375                                   | Q389       | Q316       | Q382        | Q1094       |            |            |            |            |            |            |            |            |            |            |            |            |            |            |            |            |            |            |            |
| Beta phosphate  | G36*           |                                        |            | S10        |             | S749        |            | S18        |            |            |            | S10,R11    |            |            |            |            |            |            |            |            |            |            |            | T10        |            |
| Beta phosphate  | S37*           | T19                                    |            | G12        |             | G751        | G21        | T19        | T19        | G24        | G18        | G18        | R11,G12    | T25        | T25        | S16        |            | G17        | R11,G12    | G12        | G12        | G12        | G12        | G12        | G12        |
| Beta phosphate  | G307*          | G279                                   |            |            |             |             | G284       |            |            |            |            |            |            |            |            | S277       |            |            |            |            |            |            |            |            | G236       |
| Beta phosphate  | S308*          | T280                                   |            | S230       | S285        |             | S285       | T280       | T280       |            | S277       | S277       | S230       | S282       | S282       | T273       | T291       | T291       | S273       | S230       | S230       | S246       | T231       | T231       | T237       |
| Beta phosphate  | M309*          |                                        |            |            |             |             |            |            |            |            |            |            |            |            |            |            |            |            |            |            |            |            | S232       |            | T238       |
| Beta phosphate  | G373           |                                        |            |            |             |             |            |            |            |            |            | G293       |            |            |            |            |            |            |            |            |            | S311       |            |            | G303       |
| Beta phosphate  | H375           |                                        |            |            |             |             |            |            | G332       |            |            |            |            |            |            |            |            |            |            |            |            |            |            |            |            |
| Beta phosphate  | G376           |                                        |            |            |             |             |            |            | S333       |            |            |            |            |            |            |            |            |            |            |            |            |            |            |            |            |
| Beta phosphate  | F393           |                                        | Y386       |            | Y379        |             |            |            |            |            | Y386       | Y386       |            |            |            |            |            |            |            |            |            |            |            |            |            |
| Alpha phosphate | S37*           |                                        |            |            |             |             | G21        |            |            | G24        | G18        | G18        |            | T25        | T25        |            | G26        |            |            |            |            |            | G12        | G12        |            |
| Alpha phosphate | G307*          |                                        |            |            |             |             |            |            |            |            |            |            |            |            |            |            |            |            |            |            |            |            |            |            | G236       |
| Alpha phosphate | S308*          |                                        |            |            |             |             |            |            |            | S264       |            |            |            |            |            |            |            |            |            |            |            |            |            |            |            |
| Alpha phosphate | H371           | H350                                   | H364       |            | H357        |             | H357       | H350       | H350       | H328       | H364       | H364       |            | H352       | H352       | H343       |            | H361       | H342       |            |            |            |            |            | H301       |
| Alpha phosphate | G373           |                                        |            |            |             |             |            |            | G352       |            | G332       |            |            |            |            |            |            |            |            | S295       | S295       |            |            |            |            |
| Alpha phosphate | S374           |                                        |            |            |             | S1072       |            |            |            |            | W367       | W367       |            |            |            |            |            |            |            |            |            | G313       | S298       | S298       |            |
| Alpha phosphate | H375           | N354                                   | N368       | G295       | N361        | G1073       | N361       | N354       | N354       |            | N368       | N368       | G295       | N356       | N356       | N347       | N365       | N365       | N346       |            |            | G313       | G299       | G299       |            |
| Alpha phosphate | G376           | S355                                   | S369       | T296       | S362        | T1074       | S362       | S355       | S355       |            | S369       | S369       | T296       | S357       | S357       | S348       | S366       | S366       | S347       | T298       | T298       | T314       | T300       | T300       | T306       |
| (deoxy)Ribose   | S37*           |                                        |            |            |             | R750        |            | T19        |            |            |            |            |            |            |            |            |            |            |            |            |            |            |            |            |            |
| (deoxy)Ribose   | L40*           |                                        |            |            |             |             |            |            | N27        |            |            |            |            |            |            |            |            |            |            |            |            |            |            |            |            |
| (deoxy)Ribose   | N357*          |                                        |            | H278       |             | H1056       |            |            |            |            |            |            |            | H278       |            |            |            |            |            |            |            |            |            |            |            |
| (deoxy)Ribose   | E379           | E358                                   | E372       |            | E365        |             | E365       | E358       | E358       | E336       | E373       | E372       |            | E360       | E360       | E351       | E369       | E369       | E350       |            |            |            |            |            | E309       |
| Pyrimidine ring | S37*           |                                        | G18        | R11        |             | R750        |            |            |            |            |            |            |            |            |            |            |            |            | R11        | R11        |            |            |            |            |            |
| Pyrimidine ring | R282*          |                                        |            |            |             |             |            |            |            | Q245       |            |            |            |            |            |            |            |            |            | R207       |            |            |            |            |            |
| Pyrimidine ring | K283*          |                                        |            |            |             |             |            |            |            |            |            |            |            |            |            |            |            |            |            |            |            |            |            |            | L218       |
| Pyrimidine ring | S305*          |                                        |            |            | C282        |             | C282       |            |            |            |            |            |            |            | C270       |            |            | A270       |            |            |            |            |            |            |            |
| Pyrimidine ring | R335           | S306                                   |            |            |             | N1025       |            | S306       | S290       |            |            |            | S308       | S308       |            |            |            |            |            |            |            |            | A257       | A257       |            |
| Pyrimidine ring | W353           | W332                                   | W346       |            | W339        |             | W339       | W332       | W332       | W312       | W346       | W346       |            | W334       | W334       | W325       | F343       |            | W324       |            |            |            | W279       | W279       | W285       |
| Pyrimidine ring | L354           | A333                                   | A347       | E275       | A340        |             | A340       | A333       | A333       | V313       | A347       | A347       | E275       | A335       | A335       | V326       | C344       | C344       | S325       | E277       | E277       | E293       | V280       | V280       | V286       |
| Pyrimidine ring | P355*          |                                        |            | V276       |             | V1054       |            |            |            |            |            |            | V276       |            |            |            |            |            |            | V278       | V278       | V294       |            |            |            |
| Pyrimidine ring | Q356           |                                        |            |            |             |             |            |            | Q335       |            |            |            |            |            |            |            |            | Q346       |            | L280       | L280       | F296       |            |            | H288       |
| Pyrimidine ring | N357           |                                        |            | H278       |             | H1056       |            |            |            |            |            |            | H278       |            |            |            |            |            |            |            |            |            |            |            |            |

\*: residue present within a loop region, TYD: Thymidine-5'-diphosphate, UDP: Uridine-5'-diphosphate, UDPG: Uridine-5'-diphosphate-alpha-D-glucose, U2F: Uridine-5'-diphosphate-2-deoxy-2-fluoro-alpha-D-glucose.

**Table S5.** UDPGA docking site mutagenesis

| <b>Importance</b>                  | <b>Mutation</b> | <b>-CDOCKER<br/>score<br/>(kcal mol<sup>-1</sup>)</b> | <b>UDPGA<br/>Conformation</b> | <b>RMSD from<br/>original<br/>pose (Å)</b> |
|------------------------------------|-----------------|-------------------------------------------------------|-------------------------------|--------------------------------------------|
| Co-substrate binding               | S37A            | 65.6863                                               | reversed linear               | 10.3539                                    |
| Catalytic                          | H38A            | 51.9961                                               | curved                        | 6.6236                                     |
| Catalytic                          | D150A           | 60.8324                                               | linear                        | 0.0095                                     |
| Co-substrate and substrate binding | R172A           | 69.0987                                               | curved                        | 2.9425                                     |
| Polymorphism                       | T181A           | 59.9712                                               | linear                        | 0.0007                                     |
| Polymorphism                       | R184S           | 59.8607                                               | linear                        | 0.0280                                     |
| Co-substrate binding               | S308A           | 56.5551                                               | slight curve                  | 1.3158                                     |
| Co-substrate binding               | W353A           | 64.6337                                               | reversed<br>curved            | 10.0896                                    |
| Co-substrate binding               | L354A           | 58.6522                                               | linear                        | 0.2295                                     |
| Co-substrate binding               | H375A           | 60.6102                                               | curved                        | 2.9239                                     |
| Co-substrate binding               | G376A           | 42.7748                                               | reversed<br>curved            | 11.1750                                    |
| Co-substrate and substrate binding | F393A           | 63.0931                                               | linear                        | 0.3093                                     |

**Table S6.** Substrates, docking scores, and enzyme kinetic data

| Substrate<br>(PubChem ID)            | -CDOCKER Energy<br>(kcal mol <sup>-1</sup> );<br>Molecular weight<br>(g mol <sup>-1</sup> ) | Metabolism<br>K <sub>m</sub> /S <sub>50</sub> (μM) | Reference | Rationale                                           |
|--------------------------------------|---------------------------------------------------------------------------------------------|----------------------------------------------------|-----------|-----------------------------------------------------|
| (+) -Catechin (9064)                 | 52.7769;<br>290.27                                                                          | ND                                                 | 2         | Catechin, plant substrate                           |
|                                      |                                                                                             | 3.36 ± 0.134 <sup>a,c</sup>                        | 3         |                                                     |
|                                      |                                                                                             | 78 <sup>b,g</sup>                                  | 4         |                                                     |
| 1-Naphthol (7005)                    | 6.26024;<br>144.173                                                                         | 67 <sup>a,g</sup>                                  | 5         | Naphthol, UGT1A6 substrate                          |
|                                      |                                                                                             | 84 ± 7 <sup>a,c</sup>                              |           |                                                     |
|                                      |                                                                                             | 74 ± 7 <sup>b,c</sup>                              | 6         |                                                     |
|                                      |                                                                                             | 3.1 ± 0.02 <sup>b,d</sup>                          |           |                                                     |
|                                      |                                                                                             | 8.07 ± 0.48 <sup>a,c</sup>                         |           |                                                     |
|                                      | 5.25 ± 0.23 <sup>a,c,p</sup>                                                                | 7                                                  |           |                                                     |
| 2,4,5-Trichlorophenol<br>(7271)      | 34.6477;<br>197.439                                                                         | Unknown                                            | 8         | Plant UGT72B1 substrate                             |
| 4-Hydroxytamoxifen<br>(449459)       | 15.0642;<br>387.523                                                                         | ND                                                 | 9         | Tamoxifen metabolite, other UGT substrate           |
| 4-Hydroxywarfarin<br>(54682146)      | 49.4215;<br>324.332                                                                         | ND                                                 | 10        | Coumarin, other UGT substrate                       |
| 4-Methylumbelliferone<br>(5280567)   | 40.2052;<br>176.171                                                                         | 120 ± 10 <sup>a,f</sup>                            | 11        | Coumarin, UGT1A6 substrate                          |
|                                      |                                                                                             | 109 ± 3.7 <sup>b,d</sup>                           | 6         |                                                     |
|                                      |                                                                                             | 76.4 ± 15.1 <sup>a,c</sup>                         | 7         |                                                     |
| 57.5 ± 2 <sup>a,c</sup>              |                                                                                             |                                                    |           |                                                     |
| 4-Nitrophenol (980)                  | 36.5691;<br>139.11                                                                          | 770 ± 60 <sup>a,d</sup>                            | 12        | UGT1A6 substrate                                    |
|                                      |                                                                                             | 730 ± 80 <sup>a,d,o</sup>                          |           |                                                     |
|                                      |                                                                                             | 644 ± 22 <sup>a,c</sup>                            | 3         |                                                     |
|                                      |                                                                                             | 1100 ± 230 <sup>a,d</sup>                          | 13        |                                                     |
|                                      |                                                                                             | 730 ± 150 <sup>a,d,l</sup>                         |           |                                                     |
| 570 ± 290 <sup>a,d,m</sup>           |                                                                                             |                                                    |           |                                                     |
|                                      | 450 ± 160 <sup>a,d,n</sup>                                                                  | 14                                                 |           |                                                     |
|                                      | 595 ± 140 <sup>a,g</sup>                                                                    |                                                    |           |                                                     |
| Acetaminophen (1983)                 | 22.298;<br>151.165                                                                          | 2200 ± 50 <sup>a,d</sup>                           | 15        | Phenolic drug, UGT1A6 substrate                     |
|                                      |                                                                                             | 2200 ± 300 <sup>a,c</sup>                          | 16        |                                                     |
|                                      |                                                                                             | 4000 ± 400 <sup>a,c</sup>                          | 17        |                                                     |
| Alvolidib/Flavopiridol<br>(5287969)  | 47.7067;<br>401.843                                                                         | ND                                                 | 18        | Synthetic flavonoid, other UGT substrate            |
| Apigenin (5280443)                   | 64.9334;<br>270.24                                                                          | Minimal (rate:<br>0.4<br>nmol/min/mg)              | 19        | Flavone, plant substrate & poor UGT1A6<br>substrate |
|                                      |                                                                                             | Minimal                                            | 20        |                                                     |
| Aspirin (2244)                       | 32.5819;<br>180.159                                                                         | ND                                                 | 21        | Non-metabolized control                             |
| Bilirubin (5280352)                  | 39.7054;<br>584.673                                                                         | ND                                                 | 21        | Non-metabolized control                             |
| Bilirubin Diglucuronide<br>(5459911) | ---;<br>936.328                                                                             | ---                                                |           | Non-metabolized control                             |

|                                     |                      |                                        |    |                                                            |
|-------------------------------------|----------------------|----------------------------------------|----|------------------------------------------------------------|
| Bilirubin monoglucuronide (5459858) | 10.6641;<br>760.797  | ---                                    |    | Non-metabolized control                                    |
| Biochanin A (5280373)               | 45.1212;<br>284.267  | Minimal                                | 22 | Isoflavone, plant substrate                                |
| Bisphenol A (6623)                  | 22.2207;<br>228.291  | ND                                     | 23 | Plant substrate                                            |
| Chrysin (5281607)                   | 50.0525;<br>254.241  | 12 <sup>a,c</sup>                      | 24 | Flavone, plant substrate & poor UGT1A6 substrate           |
|                                     |                      | 12.8 <sup>a,e</sup>                    | 25 |                                                            |
|                                     |                      | Minimal                                | 20 |                                                            |
| <i>cis</i> -Resveratrol (1548910)   | 42.4312;<br>228.247  | 402.1 ± 39.2 <sup>a,d</sup>            | 26 | Stilbene, UGT1A6 substrate                                 |
|                                     |                      | 749.8 ± 61.2 <sup>a,d,l</sup>          |    |                                                            |
|                                     |                      | 376 ± 28.8 <sup>a,d,m</sup>            |    |                                                            |
|                                     |                      | 945.2 ± 93.5 <sup>a,d,n</sup>          |    |                                                            |
| Codeine (5284371)                   | -34.2624;<br>299.37  | ---                                    | 27 | Opioid, UGT2B7 substrate                                   |
|                                     |                      | 989.9 ± 92.8 <sup>a,c</sup>            |    |                                                            |
| Combretastatin A4 (5351344)         | 12.5753;<br>316.353  | 44.8 ± 3.54 <sup>b,c</sup>             | 28 | Stilbene, plant & UGT1A6 substrate                         |
| Daidzein (5281708)                  | 57.7173;<br>254.241  | ND                                     | 22 | Isoflavone, plant substrate                                |
|                                     |                      | Minimal <sup>a,e</sup>                 | 29 |                                                            |
| Daphnetin (5280569)                 | 48.3861;<br>178.143  | 74.4 ± 4.1 <sup>a,c</sup>              | 30 | Coumarin, plant & UGT1A6 substrate                         |
|                                     |                      | 74.4 ± 8.8 <sup>a,c</sup>              |    |                                                            |
| Delphinidin (128853)                | 42.8066;<br>303.246  | Unknown                                | 31 | Anthocyanin, plant substrate & possible poor UGT substrate |
| Diosmetin (5281612)                 | 53.2596;<br>300.266  | 3.02 ± 0.59 <sup>a,c</sup>             | 32 | Flavone, plant substrate & UGT1A6 substrate                |
| Dopamine (681)                      | 58.8765;<br>153.181  | Minimal (rate:<br>~0.4<br>pmol/min/mg) | 33 | Poor UGT1A6 substrate, other UGT substrate                 |
| Emodin (3220)                       | 54.8205;<br>270.24   | ND                                     | 21 | Quinone, plant & other UGT substrate                       |
| Endoxifen (10090750)                | 15.4125;<br>373.496  | ND                                     | 9  | Tamoxifen metabolite, other UGT substrate                  |
| Entacapone (5281081)                | 47.0507;<br>305.29   | ND                                     | 34 | Phenolic drug, other UGT substrate                         |
| Estradiol (5757)                    | -8.44673;<br>272.388 | ND                                     | 21 | Non-metabolized control, other UGT substrate               |
| Ezetimibe (150311)                  | 48.6851;<br>409.433  | ND                                     | 35 | Phenolic drug, other UGT substrate                         |
| Fenretinide (5288209)               | -13.6979;<br>391.555 | 422 ± 46 <sup>a,c</sup>                | 36 | Phenolic drug, UGT1A6 substrate                            |
| Formononetin (5280378)              | 43.1571;<br>268.268  | ND                                     | 22 | Isoflavone, plant substrate                                |
| Galangin (5281616)                  | 60.0664;<br>270.24   | ND                                     | 21 | Flavonol, plant substrate & poor UGT1A6 substrate          |
|                                     |                      | Minimal                                | 37 |                                                            |
|                                     |                      | Minimal                                | 20 |                                                            |
| Genistein (5280961)                 | 57.9287;<br>270.24   | Minimal                                | 22 | Isoflavone, plant substrate & poor UGT1A6 substrate        |
|                                     |                      | Minimal (rate:<br>0.05<br>nmol/min/mg) | 19 |                                                            |
|                                     |                      | 220 <sup>a,e</sup>                     | 29 |                                                            |

|                               |                      |                                         |       |                                                              |
|-------------------------------|----------------------|-----------------------------------------|-------|--------------------------------------------------------------|
| Glycitein (5317750)           | 52.3694;<br>284.267  | Unknown                                 | 29    | Isoflavone, plant substrate, possible substrate              |
| Hesperetin (72281)            | 51.0055;<br>302.282  | Minimal (rate:<br>0.018<br>nmol/min/mg) | 38    | Flavanone, plant substrate & other UGT<br>substrate          |
| Irinotecan (60838)            | -28.3631;<br>586.689 | ND                                      | 39,40 | Phenolic drug, non-metabolized control                       |
| Kaempferol (5280863)          | 72.648;<br>286.239   | Minimal                                 | 41    | Flavonol, plant substrate                                    |
|                               |                      | Minimal                                 | 20    |                                                              |
| Morphine (5288826)            | -8.70848;<br>285.343 | ND                                      | 21    | Opioid, other UGT substrate                                  |
| Mycophenolic acid<br>(446541) | 13.8351;<br>320.341  | Low activity                            | 42    | Phenolic drug, other UGT substrate                           |
| Naringenin (932)              | 49.4201;<br>272.256  | Unknown                                 | 43    | Falavanone, plant substrate & other UGT<br>substrate         |
| Norepinephrine<br>(439260)    | 58.9037;<br>169.18   | Unknown                                 |       | Similar structure to serotonin/dopamine                      |
| Oleandomycin (5284598)        | -5.40868;<br>687.868 | Unknown                                 |       | Bacterial substrate                                          |
| Phenylephrine (6041)          | 22.9368;<br>167.208  | Unknown                                 | 44    | Phenolic drug, UGT substrate                                 |
| Piceatannol (667639)          | 52.4984;<br>244.246  | Minimal <sup>c</sup>                    | 45    | Stilbene, other UGT substrate, very poor<br>UGT1A6 substrate |
| Prunetin (5281804)            | 61.2897;<br>284.267  | Minimal                                 | 22    | Isoflavone, plant substrate                                  |
| Quercetin (5280343)           | 73.3885;<br>302.238  | ND                                      | 21    | Flavonol, plant substrate                                    |
|                               |                      | 3% conversion                           | 46    |                                                              |
| Raloxifene (5035)             | 31.8046;<br>473.587  | ND                                      | 47    | Phenolic drug, non-metabolized control                       |
| Scopoletin (5280460)          | 40.7312;<br>192.17   | 194 ± 6.42 <sup>a,c</sup>               | 3     | Scopoletin, UGT1A6 substrate                                 |
| Serotonin (5202)              | 26.9016;<br>176.21   | 8800 ± 300 <sup>a,k</sup>               | 48    | UGT1A6 substrate                                             |
|                               |                      | 5900 ± 200 <sup>a,e</sup>               |       |                                                              |
|                               |                      | 6500 ± 900 <sup>a,h</sup>               |       |                                                              |
|                               |                      | 4900 ± 3300 <sup>a,i</sup>              |       |                                                              |
|                               |                      | 12400 ± 2000 <sup>a,j</sup>             |       |                                                              |
|                               |                      | 5000 ± 400 <sup>a,c</sup>               |       |                                                              |
|                               |                      | 6700 ± 200 <sup>a,k</sup>               |       |                                                              |
|                               |                      | 6800 ± 400 <sup>a,k</sup>               |       |                                                              |
|                               |                      | 5200 ± 300 <sup>a,k</sup>               |       |                                                              |
|                               |                      | 8800 ± 300 <sup>a,k</sup>               |       |                                                              |
| 5700 ± 1300 <sup>a,k</sup>    | 49                   |                                         |       |                                                              |
| 6100 ± 800 <sup>a,k</sup>     |                      |                                         |       |                                                              |
| 6200 ± 500 <sup>a,k</sup>     |                      |                                         |       |                                                              |
| 5400 ± 200 <sup>a,k</sup>     |                      |                                         |       |                                                              |
| 7000 ± 300 <sup>a,k,l</sup>   | 50                   |                                         |       |                                                              |
| 2840 ± 1940 <sup>a,c</sup>    |                      |                                         |       |                                                              |
| 9800 ± 500 <sup>a,d</sup>     | 12                   |                                         |       |                                                              |
| 9900 ± 500 <sup>a,d,o</sup>   |                      |                                         |       |                                                              |
| SN38 (104842)                 | -15.0766;            | 97.2 ± 7.9 <sup>a,c</sup>               | 40    | Phenolic drug, UGT1A6 substrate                              |

|                                    |                      |                           |    |                                                 |
|------------------------------------|----------------------|---------------------------|----|-------------------------------------------------|
|                                    | 392.411              | 11.6 ± 5.2 <sup>a,d</sup> | 39 |                                                 |
| Tamoxifen (2733526)                | 12.3199;<br>371.524  | ---                       |    | Phenolic drug, non-metabolized control          |
| Testosterone (6013)                | -25.8591;<br>288.431 | ND <sup>c</sup>           | 51 | Non-metabolized control, other UGT substrate    |
| <i>trans</i> -Resveratrol (445154) | 48.8684;<br>228.247  | Minimal                   | 52 | Stilbene, other UGT substrate                   |
| Warfarin (54678486)                | 48.5637;<br>308.333  | ND                        | 10 | Coumarin, non-metabolized control               |
| Xanthohumol (639665)               | 32.1405;<br>354.402  | 3% conversion             | 53 | Chalcone, plant substrate & other UGT substrate |

ND: not detected, <sup>a</sup> K<sub>m</sub>, <sup>b</sup> S<sub>50</sub>, <sup>c</sup> recombinant protein produced in insect cells infected with baculovirus, <sup>d</sup> recombinant protein produced in HEK293 cells, <sup>e</sup> recombinant protein produced in lymphoblasts, <sup>f</sup> recombinant protein produced in a *Pichia pastoris* yeast expression system, <sup>g</sup> recombinant protein produced in V79 cells, <sup>h</sup> human kidney microsomes, <sup>i</sup> human lung microsomes, <sup>j</sup> human intestinal microsomes, <sup>k</sup> human liver microsomes, <sup>l</sup> \*2 allozyme, <sup>m</sup> \*3 allozyme, <sup>n</sup> \*4 allozyme, <sup>o</sup> i1+i2 splice isoforms, <sup>p</sup> 0.1% BSA. All recombinants are assumed to be the \*1 allozyme unless otherwise indicated.

**Table S7.** Correlation of ligand properties with the -CDOCKER Energy Score

| Ligand property                 | All docked compounds (55)     |                      | UGT1A6 substrates (27) <sup>a</sup> |                      | UGT1A6 substrates (13) <sup>b</sup> |                     |
|---------------------------------|-------------------------------|----------------------|-------------------------------------|----------------------|-------------------------------------|---------------------|
|                                 | Correlation (R <sup>2</sup> ) | Slope                | Correlation (R <sup>2</sup> )       | Slope                | Correlation (R <sup>2</sup> )       | Slope               |
| Molecular weight                | 0.1165*                       | -1.620 ± 0.6127      | 0.04786                             | -0.6719 ± 0.5994     | 0.2836                              | -2.064 ± 0.9892     |
| Molecular volume                | 0.1955**                      | -1.787 ± 0.4979      | 0.1708*                             | -1.080 ± 0.4758      | 0.399*                              | -2.158 ± 0.7988     |
| Number rotatable bonds          | 0.05447                       | -0.02733 ± 0.01564   | 0.2409**                            | -0.03791 ± 0.01346   | 0.2728                              | -0.04488 ± 0.02210  |
| Number H acceptors              | 0.005818                      | 0.006280 ± 0.01128   | 0.1629*                             | 0.02745 ± 0.01244    | 0.06638                             | 0.01720 ± 0.01944   |
| Number H donors                 | 0.01593                       | -0.006573 ± 0.007096 | 0.0289                              | -0.006331 ± 0.007340 | 0.09776                             | -0.01277 ± 0.01170  |
| Number total atoms              | 0.2180***                     | -0.3261 ± 0.08484    | 0.2696**                            | -0.2347 ± 0.07726    | 0.4658*                             | -0.4146 ± 0.1339    |
| Number polar atoms <sup>c</sup> | 0.001236                      | -0.003518 ± 0.01373  | 0.05134                             | 0.01367 ± 0.01176    | 0.00046                             | -0.001404 ± 0.01974 |

<sup>a</sup> Compounds that have some degree of detectable metabolism by UGT1A6; <sup>b</sup> Only those UGT1A6 substrates that have known Km values; <sup>c</sup> Number of oxygen and nitrogen atoms present in the compound; Slope is significantly non-zero: \* p < 0.05, \*\* p < 0.01, \*\*\* p < 0.001.



**Table S8.** Crystal structures used for definition of co-substrate and substrate docking spheres

| Organism (PDB)                                                              | Enzyme                    | Bound co-substrate | Bound substrate       | Catalytic His <sup>a</sup> | OH <sup>b</sup>                | Nε2:OH (Å) <sup>c</sup>          | C1':OH (Å) <sup>d</sup> |
|-----------------------------------------------------------------------------|---------------------------|--------------------|-----------------------|----------------------------|--------------------------------|----------------------------------|-------------------------|
| <i>Medicago truncatula</i> (2ACW)                                           | Triterpene / Flavonoid GT | UDPG               | ---                   | H22                        | ---                            | ---                              | ---                     |
| <i>Vitis vinifera</i> (2C1Z)                                                | Flavonoid GT              | U2F                | Kaempferol            | H20                        | 3-OH<br>7-OH                   | 2.696<br>9.394                   | 4.263<br>9.028          |
| <i>Vitis vinifera</i> (2C9Z)                                                | Flavonoid GT              | UDP*               | Quercetin             | H20                        | 3'-OH<br>4'-OH<br>3-OH<br>7-OH | 8.555<br>7.921<br>3.387<br>10.31 | ---                     |
| <i>Arabidopsis thaliana</i> (2VCE)                                          | Hydroquinone GT           | U2F                | 2,4,5-trichlorophenol | H19                        | 1-OH                           | 2.324                            | 3.779                   |
| <i>Actinoplanes teichomyeticus</i> / <i>Amycolatopsis orientalis</i> (3H4I) | Chimeric GT               | U2F                | ---                   | D13 <sup>e</sup>           | ---                            | ---                              | ---                     |
| <i>Medicago truncatula</i> (3HBF)                                           | Flavonoid GT              | UDP*               | Cannabiscetin         | H26                        | 3'-OH<br>3-OH<br>7-OH          | 5.448<br>4.914<br>12.201         | ---                     |
| <i>Clitoria ternatea</i> (4REL)                                             | Anthocyanidin GT          | ---                | Kaempferol            | H17                        | 3-OH<br>7-OH                   | 2.492<br>9.515                   | ---                     |
| <i>Clitoria ternatea</i> (4REM)                                             | Anthocyanidin GT          | ---                | Delphinidin           | H17                        | 3-OH<br>7-OH                   | 2.51<br>9.493                    | ---                     |
| <i>Saccharomyces cerevisiae</i> (5GL5)                                      | Sterol 3-beta-GT          | UDPG               | ---                   | D752 <sup>e</sup>          | ---                            | ---                              | ---                     |
| <i>Arabidopsis thaliana</i> (5U6M)                                          | UGT74F2                   | UDP*               | Salicylic acid        | H18                        | 2-OH                           | 5.32                             | ---                     |

<sup>a</sup> Position of the catalytic His residue numbered according to the PDB; <sup>b</sup> Position of the commonly glucuronidated OH of the substrate; <sup>c</sup> Distance between the Nε2 of the catalytic His residue and the substrate OH; <sup>d</sup> Distance between the C1' of UDPGA and the substrate OH group to be glucuronidated; <sup>e</sup> These GTs do not have a His residue at this position, instead having an Asp residue \*These bound co-substrates were not used in defining the co-substrate docking sphere.

**Table S9.** Comparison of substrate binding residues between UGT1A6 docked compounds and crystal structures

| Compound                                                                                                      | Atom                                                                                                                    | Crystal structure residue                     | UGT1A6 equivalent                | UGT1A6 interacting residue |      |
|---------------------------------------------------------------------------------------------------------------|-------------------------------------------------------------------------------------------------------------------------|-----------------------------------------------|----------------------------------|----------------------------|------|
| Quercetin<br>(PDB: 2C9Z)<br>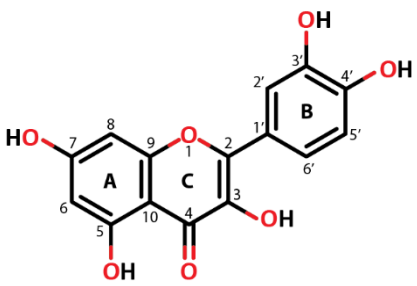 | 3'-OH                                                                                                                   | H <sub>2</sub> O<br>H150<br>S146              | H180<br>S177                     |                            |      |
|                                                                                                               | 4'-OH                                                                                                                   | H150<br>Q188                                  | H180<br>loop*                    | K228                       |      |
|                                                                                                               | B ring                                                                                                                  | F121                                          | A152                             |                            |      |
|                                                                                                               | 3-OH                                                                                                                    | H20                                           | H38                              | R172                       |      |
|                                                                                                               | 4-OH                                                                                                                    | S18<br>H20<br>H <sub>2</sub> O                | G36<br>H38                       |                            |      |
|                                                                                                               | 7-OH                                                                                                                    | Q84                                           | N115                             | H180<br>R184               |      |
|                                                                                                               | Kaempferol<br>(PDBs: 2C1Z   4REL)<br> | 4'-OH                                         | S146<br>Q188<br>H150             | S177<br>loop*<br>H180      |      |
|                                                                                                               |                                                                                                                         | B ring                                        | H20<br>H20<br>F12<br>L82<br>F121 | Q34<br>I118<br>A152        | K228 |
|                                                                                                               |                                                                                                                         | 3-OH                                          | V274<br>H17<br>H20               | V310*<br>H38               | R172 |
|                                                                                                               |                                                                                                                         | 4-OH                                          | S18<br>H20<br>N137               | G36<br>R172                |      |
| 7-OH                                                                                                          |                                                                                                                         | N84<br>D181<br>H <sub>2</sub> O<br>H20<br>H20 | N115<br>loop*<br>H180<br>R184    |                            |      |
| A ring                                                                                                        |                                                                                                                         | L196                                          | loop*                            |                            |      |
| C ring                                                                                                        |                                                                                                                         | F200                                          | K228                             |                            |      |
| 2,4,5-Trichlorophenol<br>(PDB: 2VCE)                                                                          |                                                                                                                         | 1-OH                                          | H19<br>U2F<br>H <sub>2</sub> O   | H38                        | K228 |

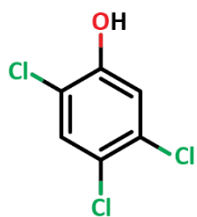

|      |                  |       |      |
|------|------------------|-------|------|
| 2-Cl | H19              | H38   |      |
| 2-Cl | I86              | I119  |      |
|      | W315             | loop* |      |
|      | H <sub>2</sub> O |       |      |
| 4-Cl | F119             | A152  |      |
|      | L183             | loop* |      |
|      | P185             | loop* |      |
|      | A387             | F393  |      |
| 5-Cl | L118             | P151  |      |
|      | V144             | S177  |      |
|      | F148             | H180  |      |
|      | L183             | loop* |      |
|      |                  |       | L225 |
| ring | F119             | A152  |      |
|      |                  |       | L225 |
|      | A387             | F393  | F393 |

\*UGT1A6 model and plant GT crystal structures aligned poorly in these regions. Water interactions are shown in blue, classical hydrogen bonds in dark green, non-classical hydrogen bonds in pale green, electrostatic interactions are shown in orange,  $\pi$ - $\pi$  stacking interactions in dark pink  $\pi$ -alkyl interactions in light pink, and  $\pi$ - $\sigma$  interactions in purple.

**Table S10.** Interactions with selected bound substrates following *in silico* mutagenesis

| Mutation  | Rank           | Substrate  | RMSD from WT (Å) | -CDOCKER score (kcal mol <sup>-1</sup> ) | -OH <sup>a</sup> | C1':OH (Å) <sup>b</sup> | Ne2:OH (Å) <sup>c</sup>              | Interactions <sup>d</sup>               |
|-----------|----------------|------------|------------------|------------------------------------------|------------------|-------------------------|--------------------------------------|-----------------------------------------|
| Wild Type | 1              | Quercetin  | ---              | 73.3885                                  | 3'-OH            | 8.34                    | 6.628                                |                                         |
|           |                |            |                  |                                          | 4'-OH            | 9.412                   | 9.106                                | R172/R172, H180, R184/R184, K228        |
|           |                |            |                  |                                          | 3-OH             | 7.513                   | 5.046                                |                                         |
|           | 2              | Kaempferol | ---              | 72.648                                   | 7-OH             | 11.743                  | 12.362                               |                                         |
|           |                |            |                  |                                          | 3-OH             | 7.455                   | 4.588                                | R172, H180, R184, K228                  |
|           | 3              | Apigenin   | ---              | 64.9334                                  | 7-OH             | 11.056                  | 11.184                               | R172, H180, R184/R184, K228             |
|           |                |            |                  |                                          | 4'-OH            | 11.443                  | 10.525                               | N115, R184/R184, K228/K228, UDPGA/UDPGA |
|           | 4              | Prunetin   | ---              | 61.2897                                  | 5-OH             | 10.768                  | 10.748                               |                                         |
|           |                |            |                  |                                          | 3-OH             | 9.677                   | 7.249                                | R184/R184, K228, UDPGA                  |
|           | 5              | Galangin   | ---              | 60.0664                                  | 7-OH             | 11.345                  | 10.577                               |                                         |
| 5-OH      |                |            |                  |                                          | 7.098            | 6.977                   | S308, K228, F393, UDPGA              |                                         |
| 6         | Norepinephrine | ---        | 58.9037          | 6-OH                                     | 9.33             | 9.07                    |                                      |                                         |
|           |                |            |                  | 5-OH                                     | 6.996            | 6.692                   | R172, K228, F393/F393, UDPGA         |                                         |
| 7         | Dopamine       | ---        | 58.8765          | 6-OH                                     | 9.259            | 8.861                   |                                      |                                         |
|           |                |            |                  | 7-OH                                     | 11.859           | 12.213                  | R172, H180, R184, K228               |                                         |
| 32        | 4-Nitrophenol  | ---        | 36.5691          | 1-OH                                     | 9.303            | 8.691                   | L225, R184/R184, K228                |                                         |
|           |                |            |                  | 5-OH                                     | 9.332            | 9.054                   | F393, K228, UDPGA/UDPGA <sup>e</sup> |                                         |
| 37        | Serotonin      | ---        | 26.9016          | 5-OH                                     | 9.332            | 9.054                   |                                      |                                         |
| 39        | Acetaminophen  | ---        | 22.298           | 1-OH                                     | 9.535            | 9.116                   | R172, K228, UDPGA                    |                                         |
| H38A      | 1              | Kaempferol | 0.1366           | 71.2639                                  | 3-OH             | 7.439                   | ---                                  |                                         |
|           |                |            |                  |                                          | 7-OH             | 11.531                  | ---                                  | R172, H180, R184, K228                  |
|           |                |            |                  |                                          | 3'-OH            | 10.642                  | ---                                  |                                         |
|           | 2              | Quercetin  | 7.3884           | 70.1748                                  | 4'-OH            | 11.381                  | ---                                  | N115, R172, R184, L225, K228, UDPGA     |
|           |                |            |                  |                                          | 3-OH             | 7.423                   | ---                                  |                                         |
| 3         | Apigenin       | 0.1222     | 64.9835          | 7-OH                                     | 9.886            | ---                     |                                      |                                         |
|           |                |            |                  | 7-OH                                     | 11.08            | ---                     | R172, H180, R184, K228               |                                         |
| 4         | Prunetin       | 0.1213     | 61.228           | 4'-OH                                    | 11.407           | ---                     | N115, R184, K228/K228, UDPGA/UDPGA   |                                         |
|           |                |            |                  | 5-OH                                     | 10.802           | ---                     |                                      |                                         |
| 5         | Galangin       | 5.7322     | 60.9539          | 3-OH                                     | 11.342           | ---                     |                                      |                                         |
|           |                |            |                  | 7-OH                                     | 9.211            | ---                     | R184, L225, K228/K228                |                                         |
| D150A     | 1              | Quercetin  | 1.4719           | 80.8552                                  | 3'-OH            | 8.44                    | 9.083                                |                                         |
|           |                |            |                  |                                          | 4'-OH            | 9.182                   | 8.015                                |                                         |
|           |                |            |                  |                                          | 3-OH             | 7.475                   | 4.497                                | R172, H180, R184, K228                  |
|           | 2              | Kaempferol | 0.7442           | 72.1385                                  | 7-OH             | 11.415                  | 11.896                               |                                         |
|           |                |            |                  |                                          | 3-OH             | 7.538                   | 5.02                                 | R172, H180, R184, K228                  |
| 3         | Apigenin       | 0.3409     | 65.5696          | 7-OH                                     | 11.712           | 12.304                  |                                      |                                         |
|           |                |            |                  | 7-OH                                     | 11.188           | 11.491                  | R172, H180, R184, K228               |                                         |
| 4         | Galangin       | 5.7151     | 62.4565          | 3-OH                                     | 11.336           | 10.738                  |                                      |                                         |
|           |                |            |                  | 7-OH                                     | 9.196            | 8.186                   | R184, L225, K228                     |                                         |
| 5         | Prunetin       | 0.2342     | 62.0587          | 4'-OH                                    | 11.414           | 10.555                  |                                      |                                         |

|       |               |            |         |         |        |        |                                                    |                                                     |
|-------|---------------|------------|---------|---------|--------|--------|----------------------------------------------------|-----------------------------------------------------|
|       |               |            |         |         | 5-OH   | 10.883 | 10.856                                             | N115, R184, K228/K228,<br>UDPGA/UDPGA               |
| R172A | 1             | Quercetin  | 3.6115  | 68.8932 | 3'-OH  | 8.486  | 8.63                                               | N115, R184/R184,<br>K228/K228,<br>UDPGA/UDPGA       |
|       |               |            |         |         | 4'-OH  | 9.624  | 10.956                                             |                                                     |
|       |               |            |         |         | 3-OH   | 9.79   | 7.252                                              |                                                     |
|       | 2             | Kaempferol | 3.6909  | 65.3047 | 7-OH   | 11.304 | 10.668                                             | N115, R184, K228,<br>UDPGA/UDPGA                    |
|       |               |            |         |         | 3-OH   | 9.756  | 7.251                                              |                                                     |
|       | 3             | Apigenin   | 6.6146  | 63.289  | 7-OH   | 9.087  | 7.774                                              | H180, R184/R184, K228,<br>UDPGA                     |
|       |               |            |         |         | 4'-OH  | 10.246 | 10.682                                             |                                                     |
|       | 4             | Prunetin   | 2.3509  | 62.5783 | 5-OH   | 7.459  | 8.192                                              | R184/R184,<br>K228/K228/K228,<br>UDPGA              |
|       |               |            |         |         | 7-OH   | 9.297  | 5.787                                              |                                                     |
|       | 5             | Genistein  | 4.4617  | 55.9765 | 7-OH   | 9.297  | 5.787                                              | H38, P151, F171,<br>A172/A172', G173,<br>K228, F393 |
|       |               |            |         |         |        |        |                                                    |                                                     |
| H180A | 1             | Quercetin  | 2.6225  | 75.2437 | 3'-OH  | 8.933  | 8.629                                              | Q34, H38, R172/R172,<br>S177, R184, K228            |
|       |               |            |         |         | 4'-OH  | 9.334  | 7.881                                              |                                                     |
|       |               |            |         |         | 3-OH   | 7.669  | 3.105                                              |                                                     |
|       | 2             | Kaempferol | 0.3141  | 67.5371 | 7-OH   | 11.316 | 10.47                                              | R172, R184, K228                                    |
|       |               |            |         |         | 3-OH   | 7.497  | 4.423                                              |                                                     |
|       | 3             | Apigenin   | 2.4233  | 60.8558 | 7-OH   | 11.362 | 11.813                                             | N115, R172/R172, R184,<br>K228                      |
|       |               |            |         |         | 7-OH   | 11.372 | 10.56                                              |                                                     |
|       | 4             | Galangin   | 5.7445  | 58.9827 | 3-OH   | 11.348 | 10.726                                             | R184, L225, K228                                    |
|       |               |            |         |         | 7-OH   | 9.175  | 8.211                                              |                                                     |
|       | 5             | Prunetin   | 0.2389  | 58.6895 | 4'-OH  | 11.411 | 10.539                                             | N115, R184, K228/K228,<br>UDPGA                     |
| 5-OH  |               |            |         |         | 10.849 | 10.821 |                                                    |                                                     |
| T181A | 1             | Quercetin  | 0.6904  | 72.4485 | 3'-OH  | 9.1456 | 6.161                                              | R172, H180, R184, K228                              |
|       |               |            |         |         | 4'-OH  | 9.122  | 8.134                                              |                                                     |
|       |               |            |         |         | 3-OH   | 7.337  | 4.948                                              |                                                     |
|       | 2             | Kaempferol | 1.9742  | 70.7189 | 7-OH   | 11.717 | 12.427                                             | Q34, H38, R172/R172,<br>S177, R184, K228            |
|       |               |            |         |         | 3-OH   | 7.671  | 3.085                                              |                                                     |
|       | 3             | Apigenin   | 6.3051  | 62.139  | 7-OH   | 11.467 | 10.473                                             | Q34, R172, H180, R184,<br>K228                      |
|       |               |            |         |         | 7-OH   | 9.194  | 7.322                                              |                                                     |
|       | 4             | Prunetin   | 3.0043  | 61.3194 | 4'-OH  | 11.354 | 10.625                                             | Q34, R184, K228                                     |
|       |               |            |         |         | 5-OH   | 9.388  | 8.508                                              |                                                     |
|       | 5             | Galangin   | 7.1028  | 61.1947 | 3-OH   | 11.61  | 10.41                                              | A181, R184, K228/L225                               |
| 7-OH  |               |            |         |         | 9.207  | 8.256  |                                                    |                                                     |
| 32    | 4-Nitrophenol | 3.8724     | 41.2233 | 1-OH    | 11.322 | 10.797 | R184/R184, L225,<br>K228/K228/K228,<br>UDPGA/UDPGA |                                                     |
|       |               |            |         |         |        |        |                                                    |                                                     |
| 38    | Serotonin     | 2.8545     | 28.0261 | 5-OH    | 5.964  | 4.593  | F393, UDPGA                                        |                                                     |
| 41    | Acetaminophen | 0.167      | 24.6834 | 1-OH    | 9.459  | 9.048  | R172, K228                                         |                                                     |
| R184A | 1             | Quercetin  | 9.7242  | 71.4492 | 3'-OH  | 9.684  | 7.016                                              | H38, K88, R172, K228,<br>UDPGA                      |
|       |               |            |         |         | 4'-OH  | 9.463  | 8.793                                              |                                                     |
|       |               |            |         |         | 3-OH   | 4.278  | 4.743                                              |                                                     |

|       |    |                |         |         |        |        |                   |                         |
|-------|----|----------------|---------|---------|--------|--------|-------------------|-------------------------|
|       |    |                |         | 7-OH    | 10.956 | 8.429  |                   |                         |
|       | 2  | Apigenin       | 10.0196 | 62.7969 | 7-OH   | 11.212 | 8.797             | K88, S308, K228         |
|       | 3  | Kaempferol     | 1.0595  | 58.3778 | 3-OH   | 7.269  | 5.381             | R172, H180, K228        |
|       |    |                |         | 7-OH    | 11.63  | 12.91  |                   |                         |
|       | 4  | Dopamine       | 1.3487  | 57.2565 | 5-OH   | 7.016  | 8.392             | Y112, K228, F393,       |
|       |    |                |         | 6-OH    | 9.386  | 9.169  | UDPGA/UDPGA       |                         |
|       | 5  | Norepinephrine | 1.4025  | 55.6979 | 5-OH   | 6.983  | 6.601             | R172, K228, F393,       |
|       |    |                |         | 6-OH    | 9.315  | 8.773  | UDPGA/UDPGA       |                         |
|       |    |                |         | 3'-OH   | 9.694  | 7.018  |                   |                         |
|       | 1  | Quercetin      | 9.7158  | 71.4267 | 4'-OH  | 9.479  | 8.798             | H38, K88, R172, K228,   |
|       |    |                |         | 3-OH    | 4.287  | 4.749  | UDPGA             |                         |
|       |    |                |         | 7-OH    | 10.953 | 8.426  |                   |                         |
|       | 2  | Apigenin       | 10.0219 | 62.7472 | 7-OH   | 11.199 | 8.747             | K88, S308, K228         |
|       | 3  | Kaempferol     | 0.9558  | 58.9523 | 3-OH   | 7.265  | 5.311             | R172, H180, K228        |
|       |    |                |         | 7-OH    | 11.864 | 12.858 |                   |                         |
| R184S | 4  | Dopamine       | 0.2299  | 57.7143 | 5-OH   | 7.07   | 6.743             | K228, F393, UDPGA       |
|       |    |                |         | 6-OH    | 7.844  | 8.881  |                   |                         |
|       | 5  | Norepinephrine | 0.4429  | 56.8494 | 5-OH   | 7.198  | 7.538             | K228, F393, UDPGA       |
|       |    |                |         | 6-OH    | 9.683  | 9.592  |                   |                         |
|       | 32 | 4-Nitrophenol  | 6.0794  | 34.5556 | 1-OH   | 9.511  | 9.373             | R172, K228, UDPGA       |
|       | 37 | Serotonin      | 0.1457  | 26.737  | 5-OH   | 9.313  | 8.992             | K228, F393, UDPGA       |
|       | 41 | Acetaminophen  | 0.2466  | 22.1607 | 1-OH   | 9.396  | 8.773             | H38, R172, K228,        |
|       |    |                |         |         |        |        | UDPGA             |                         |
|       |    |                |         | 3'-OH   | 10.638 | 11.426 |                   |                         |
|       | 1  | Quercetin      | 7.3353  | 63.2987 | 4'-OH  | 11.355 | 10.889            | N115, R172/R172,        |
|       |    |                |         | 3-OH    | 7.493  | 5.13   | R184/R184,        |                         |
|       |    |                |         | 7-OH    | 9.693  | 10.643 | UDPGA/UDPGA       |                         |
|       |    |                |         | 7-OH    | 9.693  | 10.643 |                   |                         |
|       | 2  | Kaempferol     | 5.9363  | 62.9417 | 3-OH   | 11.203 | 10.78             | R172, H180, R184/R184,  |
| K228A |    |                |         | 7-OH    | 11.38  | 14.717 | T204              |                         |
|       | 3  | Apigenin       | 2.9312  | 55.546  | 7-OH   | 11.35  | 10.787            | N115, R172, R184, F393, |
|       |    |                |         |         |        |        | UDPGA             |                         |
|       | 4  | Galangin       | 3.5476  | 53.2515 | 3-OH   | 7.719  | 3.111             | Q34, H38, R172/R172,    |
|       |    |                |         | 7-OH    | 11.364 | 10.576 | R184              |                         |
|       | 5  | Genistein      | 3.4702  | 52.1346 | 7-OH   | 11.336 | 10.686            | N115, R172, R184/R184,  |
|       |    |                |         |         |        |        | L225, UDPGA/UDPGA |                         |
|       |    |                |         | 3'-OH   | 8.996  | 10.145 |                   |                         |
|       | 1  | Quercetin      | 1.4077  | 74.2709 | 4'-OH  | 9.371  | 9.012             | R172, H180, R184, K228  |
|       |    |                |         | 3-OH    | 7.447  | 4.969  |                   |                         |
|       |    |                |         | 7-OH    | 11.729 | 12.353 |                   |                         |
|       | 2  | Kaempferol     | 7.746   | 71.9498 | 3-OH   | 9.483  | 8.59              | R184, L225, K228, A393, |
| F393A |    |                |         | 7-OH    | 8.152  | 12.596 | UDPGA             |                         |
|       | 3  | Apigenin       | 7.759   | 66.7926 | 7-OH   | 9.233  | 8.135             | H180, R184, K228, A393, |
|       |    |                |         |         |        |        | UDPGA             |                         |
|       | 4  | Galangin       | 2.1694  | 65.4804 | 3-OH   | 9.291  | 9.006             | Y112, R184, K225, K228, |
|       |    |                |         | 7-OH    | 11.327 | 10.646 | A393              |                         |
|       | 5  | Prunetin       | 1.5133  | 64.5641 | 4'-OH  | 11.367 | 10.614            | N115, R184, L225,       |
|       |    |                |         | 5-OH    | 10.318 | 10.133 | K228/K228         |                         |

<sup>a</sup> Position of the commonly glucuronidated –OH of the substrate; <sup>b</sup> Distance between the C1' of UDPGA and the substrate OH group to be glucuronidated; <sup>c</sup> Distance between the Nε2 of the catalytic H38 residue of UGT1A6 and the substrate OH; <sup>d</sup> Interactions are coloured according to type with electrostatic interactions shown in orange, classical hydrogen bonds in dark green, non-classical hydrogen bonds in pale green, π-π stacking interactions in dark pink, π-alkyl interactions in light pink, and unfavourable interactions in red; <sup>e</sup> Residues shown multiple times in different colours had multiple different types of interactions with the substrate involving different atoms of the residue and/or substrate; <sup>f</sup> Interactions with the mutated residue shown in italics.

**Table S11.** Docking scores and residue distances of top 5 substrates and 3 well-metabolized substrates docked into Ghemtio *et al* (2014) model

| Rank | Name          | Glucuronidated <sup>a</sup> | -CDOCKER Energy (kcal mol <sup>-1</sup> ) | -OH <sup>b</sup> | C1':OH (Å) <sup>c</sup> | Nε2:OH (Å) <sup>d</sup> | Interactions <sup>e</sup>                         |
|------|---------------|-----------------------------|-------------------------------------------|------------------|-------------------------|-------------------------|---------------------------------------------------|
| 1    | Quercetin     | Minimally                   | 64.4719                                   | 3'-OH            | 6.673                   | 3.75                    | G36, F171, G173, G394, D395, U2F                  |
|      |               |                             |                                           | 4'-OH            | 8.08                    | 6.059                   |                                                   |
|      |               |                             |                                           | 3-OH             | 6.639                   | 7.244                   |                                                   |
|      |               |                             |                                           | 7-OH             | 8.368                   | 8.254                   |                                                   |
| 2    | Apigenin      | Minimally                   | 59.4991                                   | 7-OH             | 6.837                   | 5.73                    | E111, F171, G173, G394, U2F                       |
| 3    | Kaempferol    | Minimally                   | 59.3939                                   | 3-OH             | 6.225                   | 7.187                   | H180, P219, S234, G394, D395, U2F/U2F             |
|      |               |                             |                                           | 7-OH             | 7.697                   | 5.132                   |                                                   |
| 4    | Genistein     | Minimally                   | 54.2317                                   | 7-OH             | 12.482                  | 11.042                  | G36, H38, H180, P219, S234, F393, G394, D395, U2F |
| 5    | Daidzein      | Minimally                   | 52.8188                                   | 7-OH             | 3.114                   | 4.48                    | G36, H38, H180, P219, S234, U2F                   |
| 30   | 4-Nitrophenol | Yes                         | 33.5717                                   | 1-OH             | 6.627                   | 5.507                   | F171/F171, G173, U2F                              |
| 36   | Acetaminophen | Yes                         | 21.6177                                   | 1-OH             | 3.338                   | 4.337                   | U2F                                               |
| 37   | Serotonin     | Yes                         | 19.8037                                   | 5-OH             | 7.844                   | 6.165                   | G36, H38/H38/H38, A152, R172, U2F                 |

<sup>a</sup> Ability of UGT1A6 to glucuronidate this compound as per table S6. <sup>b</sup> Position of the commonly glucuronidated –OH positions of the substrate; <sup>c</sup> Distance between the C1' of U2F and the substrate OH group to be glucuronidated; <sup>d</sup> Distance between the Nε2 of the catalytic H38 residue of UGT1A6 and the substrate OH; <sup>e</sup> Interactions are coloured as in Table S14.

**Table S12.** Change in structures over the course of molecular dynamics simulations

| Time  | RMSD (Å)            |        |           |       |
|-------|---------------------|--------|-----------|-------|
|       | UGT1A6 (main chain) | UDPGA  | Quercetin | 2O6L  |
| 0 ns  | 0                   | 0      | 0         | 1.712 |
| 1 ns  | 3.44                | 3.1697 | 3.1697    | 3.13  |
| 5 ns  | 3.906               | 3.7971 | 3.7971    | 3.307 |
| 10 ns | 4.093               | 4.0673 | 4.0673    | 3.712 |
| 15 ns | 4.345               | 4.8031 | 4.8031    | 3.391 |
| 20 ns | 5.067               | 5.1696 | 5.1696    | 4.295 |
| 25 ns | 4.517               | 5.0822 | 5.0822    | 3.548 |
| 30 ns | 5.277               | 5.7387 | 5.7387    | 4.694 |
| 35 ns | 5.677               | 7.2824 | 7.2824    | 4.893 |
| 40 ns | 5.668               | 6.8596 | 6.8596    | 4.259 |
| 45 ns | 5.930               | 6.6732 | 6.6732    | 4.876 |
| 50 ns | 5.795               | 6.895  | 6.895     | 4.672 |



**Table S13.** Change in UDPGA interacting residues over time

| Substructure | 0 ns                 | 1 ns                            | 5 ns                                      | 10 ns                                       | 15 ns                                                                                   | 20 ns                                        | 25 ns                                                   | 30 ns               | 35 ns                | 40 ns                                      | 45 ns                                        | 50 ns               |
|--------------|----------------------|---------------------------------|-------------------------------------------|---------------------------------------------|-----------------------------------------------------------------------------------------|----------------------------------------------|---------------------------------------------------------|---------------------|----------------------|--------------------------------------------|----------------------------------------------|---------------------|
| Glucose      | R172 <sup>a</sup>    | R172 /<br>R172                  | R172                                      | R172 /<br>R172                              | H38 /<br>H38                                                                            | R172 /<br>R172                               | H38 /<br>H38                                            | S41                 | R172 /<br>R172       | R172 /<br>R172 /<br>R172                   | R256 /<br>R256                               | R172 /<br>R172      |
|              | S308                 | R256                            | R256                                      | R256                                        | R172 /<br>R172                                                                          | G373                                         | R172 /<br>R172                                          | R172                | R256                 | 11x H <sub>2</sub> O<br>/ H <sub>2</sub> O | 6x H <sub>2</sub> O                          | 7x H <sub>2</sub> O |
|              | F393                 | S374                            | H371                                      | G373                                        | R256                                                                                    | S374                                         | H371                                                    | S374 /<br>S374      | S308                 |                                            |                                              |                     |
|              | D395                 | D395 /<br>D395                  | G373                                      | S374                                        | G373                                                                                    | D395 /<br>D395                               | G373                                                    | 7x H <sub>2</sub> O | 10x H <sub>2</sub> O |                                            |                                              |                     |
|              | Q396                 | Q396<br><br>9x H <sub>2</sub> O | D395 /<br>D395<br><br>7x H <sub>2</sub> O | D395<br><br>Q396<br><br>8x H <sub>2</sub> O | S374<br><br>D395<br><br>Q396 /<br>Q396<br><br>3x H <sub>2</sub> O /<br>H <sub>2</sub> O | 4x H <sub>2</sub> O /<br>2x H <sub>2</sub> O | S374<br><br>D395<br><br>Q396<br><br>6x H <sub>2</sub> O |                     |                      |                                            |                                              |                     |
| β-phosphate  | R172                 | S41                             | 2x H <sub>2</sub> O                       | R172                                        | 6x H <sub>2</sub> O                                                                     | H <sub>2</sub> O                             | 3x H <sub>2</sub> O                                     | S374                | H375                 | S374 /<br>S374                             | H375                                         | S374 /<br>S374      |
|              | G307                 | R172                            |                                           | R256                                        |                                                                                         |                                              |                                                         | H375                | G376                 | H375                                       | G376                                         | G376                |
|              | S308                 | 2x H <sub>2</sub> O             |                                           | 3x H <sub>2</sub> O                         |                                                                                         |                                              |                                                         | 2x H <sub>2</sub> O | H <sub>2</sub> O     | H <sub>2</sub> O                           | 2x H <sub>2</sub> O                          | 2x H <sub>2</sub> O |
| α-phosphate  | S37                  | S41                             | 3x H <sub>2</sub> O                       | S41                                         | H371                                                                                    | G307                                         | H371                                                    | H371                | G307                 | H371                                       | H371                                         | H371                |
|              | R256                 | R256                            |                                           | R256                                        | 3x H <sub>2</sub> O                                                                     | S308                                         | 3x H <sub>2</sub> O                                     | G373                | H371                 | G373                                       | G376 /<br>G376                               | G373                |
|              | G307                 | H <sub>2</sub> O                |                                           | 2x H <sub>2</sub> O                         |                                                                                         | H371                                         |                                                         | 3x H <sub>2</sub> O | G376                 | G376                                       | 3x H <sub>2</sub> O                          | G376 /<br>G376      |
|              | H371                 |                                 |                                           |                                             |                                                                                         | H <sub>2</sub> O                             |                                                         |                     |                      | 2x H <sub>2</sub> O                        |                                              | 2x H <sub>2</sub> O |
|              | G373<br>H375<br>G376 |                                 |                                           |                                             |                                                                                         |                                              |                                                         |                     |                      |                                            |                                              |                     |
| Ribose       | G307 /<br>G307       | G307 /<br>G307                  | S308                                      | 3x H <sub>2</sub> O /<br>H <sub>2</sub> O   | G307                                                                                    | 2x H <sub>2</sub> O                          | S308                                                    | 4x H <sub>2</sub> O | S308                 | G307                                       | S308                                         | G307                |
|              | N356 /<br>N356       | 4x H <sub>2</sub> O             | 4x H <sub>2</sub> O                       |                                             | S308                                                                                    |                                              | 5x H <sub>2</sub> O                                     |                     | 8x H <sub>2</sub> O  | S308                                       | 4x H <sub>2</sub> O /<br>2x H <sub>2</sub> O | H371                |
|              |                      |                                 |                                           |                                             | 4x H <sub>2</sub> O                                                                     |                                              |                                                         |                     |                      | 5x H <sub>2</sub> O                        |                                              | 6x H <sub>2</sub> O |

|                    |      |                     |                     |                     |                     |                     |                     |                     |                     |                     |                     |                     |
|--------------------|------|---------------------|---------------------|---------------------|---------------------|---------------------|---------------------|---------------------|---------------------|---------------------|---------------------|---------------------|
|                    | L281 | Q356                | K283                | W353                | G307                | R335                | R335                | G307                | G307                | S308                | Y336                | R335                |
|                    | R335 | 3x H <sub>2</sub> O | 3x H <sub>2</sub> O | 6x H <sub>2</sub> O | R335                | Y336                | Y336                | R335                | S308 /<br>S308      | Y336                | T337                | Y336                |
|                    | W353 |                     |                     |                     | T337                | T337                | T337                | 6x H <sub>2</sub> O | Y336                | T337                | 4x H <sub>2</sub> O | T337                |
| Pyrimidine<br>ring | L354 |                     |                     |                     | 6x H <sub>2</sub> O | 2x H <sub>2</sub> O | 7x H <sub>2</sub> O |                     | T337                | 2x H <sub>2</sub> O |                     | 3x H <sub>2</sub> O |
|                    | P355 |                     |                     |                     |                     |                     |                     |                     | 4x H <sub>2</sub> O |                     |                     |                     |
|                    | Q356 |                     |                     |                     |                     |                     |                     |                     |                     |                     |                     |                     |
|                    | N357 |                     |                     |                     |                     |                     |                     |                     |                     |                     |                     |                     |
|                    | E379 |                     |                     |                     |                     |                     |                     |                     |                     |                     |                     |                     |

<sup>a</sup> Interactions are coloured as in Table S10, with water interactions shown in blue.

**Table S14.** Change in Quercetin interacting residues over time.

| Compound                                                                          | Atom   | 0ns          | 1 ns                                     | 5 ns                             | 10 ns                            | 15 ns                       | 20 ns                       | 25 ns                            | 30 ns                       | 35 ns                    | 40 ns                                      | 45 ns                       | 50 ns                       |                                  |
|-----------------------------------------------------------------------------------|--------|--------------|------------------------------------------|----------------------------------|----------------------------------|-----------------------------|-----------------------------|----------------------------------|-----------------------------|--------------------------|--------------------------------------------|-----------------------------|-----------------------------|----------------------------------|
| 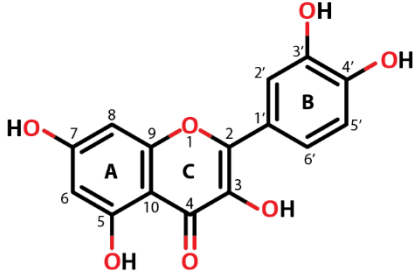 | 3'-OH  |              | A152<br>H <sub>2</sub> O                 | 2x H <sub>2</sub> O              | Y229<br>H <sub>2</sub> O         | H <sub>2</sub> O            |                             | Y247                             | Y247<br>H <sub>2</sub> O    | K228<br>H <sub>2</sub> O | K228 /<br>K228                             | K228<br>H <sub>2</sub> O    | 3x H <sub>2</sub> O         |                                  |
|                                                                                   | 4'-OH  | K228         | K228<br>3x H <sub>2</sub> O              | K228<br>3x H <sub>2</sub> O      | K228<br>Y229                     | Y229<br>H <sub>2</sub> O    | Y229                        | H <sub>2</sub> O                 | Y229                        | Y229<br>H <sub>2</sub> O | C224<br>K228 /<br>K228<br>H <sub>2</sub> O | K228<br>H <sub>2</sub> O    | K228<br>H <sub>2</sub> O    | 3x H <sub>2</sub> O              |
|                                                                                   | B ring |              | A152                                     | A152                             | L225                             | A152<br>L225                |                             | L225                             |                             | C224**<br>L225           | L225                                       | L221<br>L225                | L225                        |                                  |
|                                                                                   | A ring | R184         | F171                                     | F171                             | F171                             |                             |                             |                                  |                             |                          | P154                                       | A152                        | A152                        |                                  |
|                                                                                   | C ring |              | F171                                     | F171                             | F171                             | H <sub>2</sub> O*           |                             |                                  |                             |                          | A152 /<br>A152*                            | A152                        |                             |                                  |
|                                                                                   | 3-OH   | R172         | A152<br>R172                             | R172                             | R172<br>A152<br>H <sub>2</sub> O | R172<br>A152<br>R172        | H38<br>A152<br>R172         | R172                             | R172<br>H <sub>2</sub> O    | A152<br>H <sub>2</sub> O | 2x H <sub>2</sub> O                        | H38<br>2x H <sub>2</sub> O  | A152<br>2x H <sub>2</sub> O | H <sub>2</sub> O                 |
|                                                                                   | 4-OH   |              | H <sub>2</sub> O                         |                                  | H <sub>2</sub> O                 | R172<br>3x H <sub>2</sub> O |                             | R172<br>H <sub>2</sub> O         | 3x H <sub>2</sub> O         | 2x H <sub>2</sub> O      | 2x H <sub>2</sub> O                        | H <sub>2</sub> O            | A152<br>H <sub>2</sub> O    | H <sub>2</sub> O                 |
|                                                                                   | 5-OH   |              | G173                                     | G173                             |                                  | G394<br>H <sub>2</sub> O    | G394<br>H <sub>2</sub> O    | G394<br>D395<br>H <sub>2</sub> O | 2x H <sub>2</sub> O         | D395<br>H <sub>2</sub> O | H <sub>2</sub> O/H <sub>2</sub> O          | R172<br>H <sub>2</sub> O    | H <sub>2</sub> O            | H <sub>2</sub> O                 |
|                                                                                   | 7-OH   | H180<br>R184 | S177<br>F393<br>G394<br>H <sub>2</sub> O | S177<br>G394<br>H <sub>2</sub> O | G394<br>H <sub>2</sub> O         | H180<br>2x H <sub>2</sub> O | H180<br>2x H <sub>2</sub> O | R172<br>H180<br>H <sub>2</sub> O | H180<br>2x H <sub>2</sub> O | H180<br>H <sub>2</sub> O |                                            | Y247<br>2x H <sub>2</sub> O | 4x H <sub>2</sub> O         | P154<br>Y247<br>H <sub>2</sub> O |

\* $\pi$ -lone pair interaction, \*\* $\pi$ -sulfur interaction, other interactions are coloured according to type as in Table S10, with water interactions shown in blue.

**Table S15.** Distances between potential quercetin glucuronidation sites and important enzyme and co-substrate atoms over time.

| Measure   | Slope                   | Distance (Å) |        |        |        |        |        |        |        |        |        |        |
|-----------|-------------------------|--------------|--------|--------|--------|--------|--------|--------|--------|--------|--------|--------|
|           |                         | 0 ns         | 5 ns   | 10 ns  | 15 ns  | 20 ns  | 25 ns  | 30 ns  | 35 ns  | 40 ns  | 45 ns  | 50 ns  |
| 3'-OH:Nε2 | -0.0005236 ± 1.286e-005 | 6.628        | 10.590 | 10.230 | 9.845  | 9.541  | 10.533 | 10.599 | 7.0179 | 8.156  | 6.900  | 8.156  |
| 3'-OH:C1' | 0.001473 ± 1.395e-005   | 8.34         | 15.590 | 15.413 | 16.034 | 14.635 | 15.452 | 18.611 | 21.736 | 18.421 | 20.506 | 21.140 |
| 4'-OH:Nε2 | 0.0004419 ± 1.046e-005  | 6.451        | 8.338  | 8.420  | 8.699  | 9.999  | 8.920  | 9.050  | 9.261  | 9.885  | 9.445  | 10.680 |
| 4'-OH:C1' | 0.001922 ± 1.689e-005   | 11.732       | 15.086 | 15.219 | 15.845 | 16.206 | 14.869 | 18.766 | 23.312 | 19.335 | 21.978 | 22.626 |
| 3-OH:Nε2  | -0.0001180 ± 1.155e-005 | 5.046        | 7.906  | 8.159  | 4.779  | 7.180  | 6.996  | 6.565  | 6.479  | 4.993  | 5.675  | 6.695  |
| 3-OH:C1'  | 0.001755 ± 1.489e-005   | 7.513        | 10.231 | 10.508 | 9.794  | 10.101 | 10.550 | 12.856 | 17.537 | 13.382 | 15.648 | 16.670 |
| 7-OH:Nε2  | -0.0005080 ± 1.322e-005 | 12.362       | 14.183 | 12.662 | 11.119 | 12.457 | 11.966 | 10.599 | 11.614 | 10.269 | 13.112 | 9.142  |
| 7-OH:C1'  | 0.001642 ± 1.767e-005   | 11.743       | 11.079 | 10.588 | 13.092 | 12.616 | 11.428 | 14.931 | 19.549 | 11.811 | 17.492 | 18.535 |

**Table S16.** Top 10 I-TASSER threading alignments for each set of input conditions

| Input | Rank <sup>a</sup> | Algorithm         | PDB:Chain              | Thread ID (%) <sup>b</sup> | Total ID (%) <sup>c</sup> | Coverage <sup>d</sup> | Z-score <sup>e</sup> |
|-------|-------------------|-------------------|------------------------|----------------------------|---------------------------|-----------------------|----------------------|
| WSNT  | 1                 | MUSTER            | <a href="#">5gl5:A</a> | 18                         | 18                        | 0.78                  | 1.75                 |
|       | 2                 | FFAS-3D           | <a href="#">5gl5:A</a> | 17                         | 18                        | 0.78                  | 2.99                 |
|       | 3                 | SPARKS-X          | <a href="#">2iya:A</a> | 17                         | 18                        | 0.72                  | 1.74                 |
|       | 4                 | HHSEARCH2         | <a href="#">5gl5:A</a> | 18                         | 18                        | 0.78                  | 2.56                 |
|       | 5                 | HHSEARCH I        | <a href="#">5gl5:A</a> | 18                         | 18                        | 0.78                  | 2.23                 |
|       | 6                 | Neff-PPAS         | <a href="#">2iyf:B</a> | 18                         | 18                        | 0.73                  | 2.46                 |
|       | 7                 | HHSEARCH          | <a href="#">2pq6:A</a> | 20                         | 17                        | 0.74                  | 3.22                 |
|       | 8                 | pGenTHREADER      | <a href="#">4m83:A</a> | 17                         | 19                        | 0.73                  | 4.39                 |
|       | 9                 | wdPPAS            | <a href="#">5gl5:A</a> | 18                         | 18                        | 0.78                  | 1.62                 |
|       | 10                | cdPPAS            | <a href="#">2iya:A</a> | 00                         | 18                        | 0.73                  | 2.83                 |
| NSNT  | 1                 | MUSTER            | <a href="#">5gl5:A</a> | 17                         | 20                        | 0.82                  | 1.78                 |
|       | 2                 | FFAS-3D           | <a href="#">2iyf:A</a> | 18                         | 19                        | 0.75                  | 3.03                 |
|       | 3                 | SPARKS-X          | <a href="#">2iya:A</a> | 18                         | 19                        | 0.74                  | 1.86                 |
|       | 4                 | HHSEARCH2         | <a href="#">5gl5:A</a> | 18                         | 20                        | 0.81                  | 2.59                 |
|       | 5                 | HHSEARCH I        | <a href="#">5gl5:A</a> | 18                         | 20                        | 0.82                  | 2.20                 |
|       | 6                 | Neff-PPAS         | <a href="#">2iyf:B</a> | 18                         | 19                        | 0.76                  | 2.57                 |
|       | 7                 | HHSEARCH          | <a href="#">2pq6:A</a> | 20                         | 18                        | 0.79                  | 3.23                 |
|       | 8                 | pGenTHREADER      | <a href="#">2iya:A</a> | 18                         | 19                        | 0.76                  | 4.28                 |
|       | 9                 | wdPPAS            | <a href="#">2iyf:B</a> | 18                         | 19                        | 0.76                  | 1.66                 |
|       | 10                | PROSPECT2         | <a href="#">2iyf:A</a> | 18                         | 19                        | 0.75                  | 2.93                 |
| WSWT  | 1                 | USER <sup>f</sup> | <a href="#">2o6l:A</a> | 55                         | 17                        | 0.30                  | 10.00                |
|       | 2                 | FFAS-3D           | <a href="#">2o6l:A</a> | 58                         | 16                        | 0.29                  | 2.35                 |
|       | 3                 | FFAS03            | <a href="#">2o6l:A</a> | 54                         | 16                        | 0.29                  | 2.95                 |
|       | 4                 | pGenTHREADER      | <a href="#">2o6l:A</a> | 59                         | 18                        | 0.30                  | 3.54                 |
|       | 5                 | HHSEARCH I        | <a href="#">2acv:A</a> | 16                         | 18                        | 0.75                  | 1.82                 |
|       | 6                 | HHSEARCH2         | <a href="#">2acv:A</a> | 16                         | 18                        | 0.75                  | 2.33                 |
|       | 7                 | SPARKS-X          | <a href="#">2acv:A</a> | 16                         | 18                        | 0.76                  | 1.30                 |
|       | 8                 | HHSEARCH          | <a href="#">2acv:A</a> | 15                         | 18                        | 0.76                  | 2.69                 |
|       | 9                 | HHSEARCH2         | <a href="#">5tme:A</a> | 18                         | 18                        | 0.73                  | 2.33                 |
|       | 10                | HHSEARCH          | <a href="#">5tme:A</a> | 18                         | 18                        | 0.73                  | 2.86                 |
| NSWT  | 1                 | USER              | <a href="#">2o6l:A</a> | 55                         | 17                        | 0.32                  | 10.00                |
|       | 2                 | FFAS-3D           | <a href="#">2o6l:A</a> | 58                         | 17                        | 0.31                  | 2.35                 |
|       | 3                 | FFAS03            | <a href="#">2o6l:A</a> | 53                         | 17                        | 0.30                  | 2.98                 |
|       | 4                 | pGenTHREADER      | <a href="#">2o6l:A</a> | 59                         | 19                        | 0.32                  | 3.43                 |
|       | 5                 | HHSEARCH I        | <a href="#">2acv:A</a> | 16                         | 19                        | 0.77                  | 1.83                 |
|       | 6                 | HHSEARCH I        | <a href="#">5tme:A</a> | 18                         | 19                        | 0.77                  | 1.98                 |
|       | 7                 | HHSEARCH2         | <a href="#">2acv:A</a> | 16                         | 19                        | 0.77                  | 2.35                 |
|       | 8                 | SPARKS-X          | <a href="#">2acv:A</a> | 18                         | 19                        | 0.79                  | 1.38                 |
|       | 9                 | HHSEARCH          | <a href="#">2acv:A</a> | 15                         | 19                        | 0.79                  | 2.76                 |
|       | 10                | HHSEARCH2         | <a href="#">5tme:A</a> | 18                         | 19                        | 0.77                  | 2.42                 |

<sup>a</sup> Top ten threading templates used by I-TASSER, <sup>b</sup> Percent sequence identity of template and query sequence within threading aligned region, <sup>c</sup> percent sequence identity over the entire template and query sequence, <sup>d</sup> coverage of the threading alignment with query (number aligned residues divided by length of query), <sup>e</sup> Normalized Z-score of the threading alignments, alignments with a score >1 indicate a good alignment, <sup>f</sup> user supplied template sequence – UGT2B7 C-terminal end. Structural and sequence alignments are available in the “Supplemental structures” zip file.

**Table S17.** Top 10 identified structural analogues to I-TASSER constructed models

| Model | Rank <sup>a</sup> | PDB                    | Enzyme                                   | TM-score | RMSD <sup>b</sup> | ID <sup>c</sup> | Coverage <sup>d</sup> |
|-------|-------------------|------------------------|------------------------------------------|----------|-------------------|-----------------|-----------------------|
| WSNT  | 1                 | <a href="#">5gl5:A</a> | Sterol 3-beta-glucosyltransferase        | 0.777    | 0.9               | 0.165           | 0.786                 |
|       | 2                 | <a href="#">1rrv:A</a> | TDP-vancosaminyltransferase GtfD         | 0.663    | 3.09              | 0.157           | 0.737                 |
|       | 3                 | <a href="#">1iir:A</a> | UDP-glucosyltransferase GtfB             | 0.651    | 2.48              | 0.152           | 0.703                 |
|       | 4                 | <a href="#">3oth:A</a> | Calicheamicin Glycosyltransferase        | 0.632    | 3.47              | 0.139           | 0.714                 |
|       | 5                 | <a href="#">3rsc:A</a> | Calicheamicin Glycosyltransferase        | 0.629    | 3.54              | 0.178           | 0.716                 |
|       | 6                 | <a href="#">3h4t:A</a> | Chimeric glycosyltransferase             | 0.625    | 3.18              | 0.159           | 0.701                 |
|       | 7                 | <a href="#">2acw:A</a> | Triterpene/Flavonoid Glycosyltransferase | 0.624    | 4.25              | 0.155           | 0.733                 |
|       | 8                 | <a href="#">2iya:A</a> | Oleandomycin Glycosyltransferase         | 0.622    | 3.6               | 0.179           | 0.707                 |
|       | 9                 | <a href="#">3wc4:A</a> | anthocyanidin 3-O-glucosyltransferase    | 0.62     | 4.41              | 0.15            | 0.733                 |
|       | 10                | <a href="#">3ia7:A</a> | Calicheamicin Glycosyltransferase        | 0.618    | 3.76              | 0.161           | 0.724                 |
| NSNT  | 1                 | <a href="#">5gl5:A</a> | Sterol 3-beta-glucosyltransferase        | 0.806    | 1.12              | 0.181           | 0.818                 |
|       | 2                 | <a href="#">1rrv:A</a> | TDP-vancosaminyltransferase GtfD         | 0.701    | 2.87              | 0.155           | 0.773                 |
|       | 3                 | <a href="#">1iir:A</a> | UDP-glucosyltransferase GtfB             | 0.683    | 2.51              | 0.147           | 0.737                 |
|       | 4                 | <a href="#">3rsc:A</a> | Calicheamicin Glycosyltransferase        | 0.666    | 3.37              | 0.175           | 0.751                 |
|       | 5                 | <a href="#">3h4i:A</a> | Chimeric glycosyltransferase             | 0.659    | 3.01              | 0.161           | 0.731                 |
|       | 6                 | <a href="#">2iya:A</a> | Oleandomycin Glycosyltransferase         | 0.658    | 3.32              | 0.177           | 0.743                 |
|       | 7                 | <a href="#">3oth:A</a> | Calicheamicin Glycosyltransferase        | 0.656    | 3.58              | 0.14            | 0.745                 |
|       | 8                 | <a href="#">5tmb:A</a> | Ox70 UDP-glucosyltransferase             | 0.649    | 4.31              | 0.162           | 0.767                 |
|       | 9                 | <a href="#">3ia7:A</a> | Calicheamicin Glycosyltransferase        | 0.648    | 3.77              | 0.161           | 0.759                 |
|       | 10                | <a href="#">1pnv:B</a> | TDP-epi-Vancosaminyltransferase GtfA     | 0.646    | 3.19              | 0.14            | 0.727                 |
| WSWT  | 1                 | <a href="#">2acw:A</a> | Triterpene/Flavonoid Glycosyltransferase | 0.715    | 2.05              | 0.16            | 0.752                 |
|       | 2                 | <a href="#">2vce:A</a> | Hydroquinone Glucosyltransferase         | 0.699    | 2.49              | 0.157           | 0.748                 |
|       | 3                 | <a href="#">3wc4:A</a> | anthocyanidin 3-O-glucosyltransferase    | 0.694    | 2.9               | 0.16            | 0.763                 |
|       | 4                 | <a href="#">5tmb:A</a> | Ox70 UDP-glucosyltransferase             | 0.69     | 2.76              | 0.163           | 0.75                  |
|       | 5                 | <a href="#">3hbj:A</a> | Flavonoid 3-O-glucosyltransferase        | 0.689    | 2.84              | 0.181           | 0.757                 |
|       | 6                 | <a href="#">2c9z:A</a> | Flavonoid 3-O-glucosyltransferase        | 0.685    | 2.88              | 0.162           | 0.752                 |
|       | 7                 | <a href="#">5u6m:A</a> | UDP-glycosyltransferase 74F2             | 0.684    | 2.57              | 0.178           | 0.739                 |
|       | 8                 | <a href="#">2pq6:A</a> | UDP-glucosyltransferase                  | 0.67     | 2.81              | 0.195           | 0.729                 |
|       | 9                 | <a href="#">5gl5:A</a> | Sterol 3-beta-glucosyltransferase        | 0.66     | 3.6               | 0.156           | 0.748                 |
|       | 10                | <a href="#">3oth:A</a> | Calicheamicin Glycosyltransferase        | 0.629    | 3.5               | 0.158           | 0.72                  |
| NSWT  | 1                 | <a href="#">2acw:A</a> | Triterpene/Flavonoid Glycosyltransferase | 0.73     | 2.28              | 0.163           | 0.777                 |
|       | 2                 | <a href="#">5tmb:A</a> | Ox70 UDP-glucosyltransferase             | 0.726    | 2.51              | 0.167           | 0.781                 |
|       | 3                 | <a href="#">2vce:A</a> | Hydroquinone Glucosyltransferase         | 0.726    | 2.6               | 0.158           | 0.783                 |
|       | 4                 | <a href="#">5u6m:A</a> | UDP-glycosyltransferase 74F2             | 0.72     | 2.44              | 0.181           | 0.775                 |
|       | 5                 | <a href="#">3wc4:A</a> | anthocyanidin 3-O-glucosyltransferase    | 0.713    | 2.95              | 0.162           | 0.79                  |
|       | 6                 | <a href="#">3hbj:A</a> | Flavonoid 3-O-glucosyltransferase        | 0.711    | 2.91              | 0.168           | 0.787                 |
|       | 7                 | <a href="#">2c9z:A</a> | Flavonoid 3-O-glucosyltransferase        | 0.71     | 2.94              | 0.156           | 0.785                 |
|       | 8                 | <a href="#">2pq6:A</a> | UDP-glucosyltransferase                  | 0.697    | 2.77              | 0.193           | 0.761                 |
|       | 9                 | <a href="#">5gl5:A</a> | Sterol 3-beta-glucosyltransferase        | 0.682    | 3.83              | 0.15            | 0.785                 |
|       | 10                | <a href="#">2iya:A</a> | Oleandomycin Glycosyltransferase         | 0.65     | 3.55              | 0.192           | 0.745                 |

<sup>a</sup> Rank is based on TM-score; <sup>b</sup> RMSD is the RMSD in Å between residues that are structurally aligned by TM-align; <sup>c</sup> the percent sequence identity in the structurally aligned region; <sup>d</sup> the number of structurally aligned residues divided by length of the query protein.

**Table S18.** Glycosyltransferase crystal structures available in the RCSB database

| PDB  | Kingdom  | Organism                                                              | Enzyme                                                                                                              | Gene       | Uniprot |
|------|----------|-----------------------------------------------------------------------|---------------------------------------------------------------------------------------------------------------------|------------|---------|
| 1FOK | Bacteria | <i>Escherichia coli</i> (K12)                                         | UDP-N-acetylglucosamine--N-acetylmuramyl-(pentapeptide) pyrophosphoryl-undecaprenol N-acetylglucosamine transferase | murG       | P17443  |
| 1IIR | Bacteria | <i>Amycolatopsis orientalis</i>                                       | UDP-glucosyltransferase GtfB                                                                                        | GtfB       | P96559  |
| 1NLM | Bacteria | <i>Escherichia coli</i> (K12)                                         | UDP-N-acetylglucosamine--N-acetylmuramyl-(pentapeptide) pyrophosphoryl-undecaprenol N-acetylglucosamine transferase | murG       | P17443  |
| 1PN3 | Bacteria | <i>Amycolatopsis orientalis</i>                                       | TDP-epi-Vancosaminyltransferase GtfA                                                                                | GtfA       | P96558  |
| 1PNV | Bacteria | <i>Amycolatopsis orientalis</i>                                       | TDP-epi-Vancosaminyltransferase GtfA                                                                                | GtfA       | P96558  |
| 1RRV | Bacteria | <i>Amycolatopsis orientalis</i>                                       | TDP-vancosaminyltransferase GtfD                                                                                    | GtfD       | Q9AFC7  |
| 2ACV | Plantae  | <i>Medicago truncatula</i>                                            | Triterpene/Flavonoid Glycosyltransferase                                                                            | UGT71G1    | Q5IFH7  |
| 2ACW | Plantae  | <i>Medicago truncatula</i>                                            | Triterpene/Flavonoid Glycosyltransferase                                                                            | UGT71G1    | Q5IFH7  |
| 2C1X | Plantae  | <i>Vitis vinifera</i>                                                 | Flavonoid 3-O-glucosyltransferase                                                                                   | UFGT       | P51094  |
| 2C1Z | Plantae  | <i>Vitis vinifera</i>                                                 | Flavonoid 3-O-glucosyltransferase                                                                                   | UFGT       | P51094  |
| 2C9Z | Plantae  | <i>Vitis vinifera</i>                                                 | Flavonoid 3-O-glucosyltransferase                                                                                   | UFGT       | P51094  |
| 2HY7 | Bacteria | <i>Xanthomonas campestris</i> pv. <i>Campestris</i>                   | beta-1,2-glucuronosyltransferase                                                                                    | gumK       | Q8GCH2  |
| 2IYA | Bacteria | <i>Streptomyces antibioticus</i>                                      | Oleandomycin Glycosyltransferase                                                                                    | OleI       | Q3HTL7  |
| 2O6L | Animalia | <i>Homo sapiens</i>                                                   | UDP-Glucuronosyltransferase 2B7                                                                                     | UGT2B7     | P16662  |
| 2P6P | Bacteria | <i>Streptomyces fradiae</i>                                           | dTDP-D-Olivose-transferase UrdGT2                                                                                   | UrdGT2     | Q9RPA7  |
| 2PQ6 | Plantae  | <i>Medicago truncatula</i>                                            | UDP-glucosyltransferase                                                                                             | UGT85H2    | A6XNC5  |
| 2Q6V | Bacteria | <i>Xanthomonas campestris</i> pv. <i>Campestris</i>                   | beta-1,2-glucuronosyltransferase                                                                                    | gumK       | Q8GCH2  |
| 2VCE | Plantae  | <i>Arabidopsis thaliana</i>                                           | Hydroquinone Glucosyltransferase                                                                                    | UGT72B1    | Q9M156  |
| 2VCH | Plantae  | <i>Arabidopsis thaliana</i>                                           | Hydroquinone Glucosyltransferase                                                                                    | UGT72B1    | Q9M156  |
| 2VG8 | Plantae  | <i>Arabidopsis thaliana</i>                                           | Hydroquinone Glucosyltransferase                                                                                    | UGT72B1    | Q9M156  |
| 3CUY | Bacteria | <i>Xanthomonas campestris</i> pv. <i>Campestris</i>                   | beta-1,2-glucuronosyltransferase                                                                                    | gumK       | Q8GCH2  |
| 3CV3 | Bacteria | <i>Xanthomonas campestris</i> pv. <i>Campestris</i>                   | beta-1,2-glucuronosyltransferase                                                                                    | gumK       | Q8GCH2  |
| 3DOR | Bacteria | <i>Micromonospora echinospora</i>                                     | Calicheamicin Glycosyltransferase                                                                                   | CalG3      | Q8KND7  |
| 3H4I | Bacteria | <i>Actinoplanes teichomyceticus</i> , <i>Amycolatopsis orientalis</i> | Chimeric glycosyltransferase                                                                                        | tcp8, gtfA | Q6ZZJ7  |
| 3H4T | Bacteria | <i>Actinoplanes teichomyceticus</i> , <i>Amycolatopsis orientalis</i> | Chimeric glycosyltransferases                                                                                       | tcp8, gtfA | P96558  |
| 3HBF | Plantae  | <i>Medicago truncatula</i>                                            | Flavonoid 3-O-glucosyltransferase                                                                                   | UGT78G1    | A6XNC6  |
| 3HBJ | Plantae  | <i>Medicago truncatula</i>                                            | Flavonoid 3-O-glucosyltransferase                                                                                   | UGT78G1    | A6XNC6  |
| 3IA7 | Bacteria | <i>Micromonospora echinospora</i>                                     | Calicheamicin Glycosyltransferase                                                                                   | CalG4      | Q8KNC3  |
| 3OTG | Bacteria | <i>Micromonospora echinospora</i>                                     | Calicheamicin Glycosyltransferase                                                                                   | CalG1      | Q8KNF2  |
| 3OTH | Bacteria | <i>Micromonospora echinospora</i>                                     | Calicheamicin Glycosyltransferase                                                                                   | CalG1      | Q8KNF2  |
| 3RSC | Bacteria | <i>Micromonospora echinospora</i>                                     | Calicheamicin Glycosyltransferase                                                                                   | CalG2      | Q8KNE0  |

|      |          |                                                               |                                                                                                                     |           |                  |
|------|----------|---------------------------------------------------------------|---------------------------------------------------------------------------------------------------------------------|-----------|------------------|
| 3S2U | Bacteria | <i>Pseudomonas aeruginosa</i>                                 | UDP-N-acetylglucosamine--N-acetylmuramyl-(pentapeptide) pyrophosphoryl-undecaprenol N-acetylglucosamine transferase | murG      | Q9HW01           |
| 3WC4 | Plantae  | <i>Clitoria ternatea</i>                                      | anthocyanidin 3-O-glucosyltransferase                                                                               | Ct3GT-A   | A4F1R4           |
| 4PQG | Bacteria | <i>Streptococcus pneumoniae</i> (strain ATCC BAA-334 / TIGR4) | Glycosyltransferase GtfA                                                                                            | gtfA      | A0A0H2URG7       |
| 4REL | Plantae  | <i>Clitoria ternatea</i>                                      | anthocyanidin 3-O-glucosyltransferase                                                                               | Ct3GT-A   | A4F1R4           |
| 4REM | Plantae  | <i>Clitoria ternatea</i>                                      | anthocyanidin 3-O-glucosyltransferase                                                                               | Ct3GT-A   | A4F1R4           |
| 4REN | Plantae  | <i>Clitoria ternatea</i>                                      | anthocyanidin 3-O-glucosyltransferase                                                                               | Ct3GT-A   | A4F1R4           |
| 4WHM | Plantae  | <i>Clitoria ternatea</i>                                      | anthocyanidin 3-O-glucosyltransferase                                                                               | Ct3GT-A   | A4F1R4           |
| 4WYI | Plantae  | <i>Arabidopsis thaliana</i>                                   | Monogalactosyldiacylglycerol synthase 1                                                                             | MGD1      | O81770           |
| 4X1T | Plantae  | <i>Arabidopsis thaliana</i>                                   | Monogalactosyldiacylglycerol synthase 1                                                                             | MGD1      | O81770           |
| 5E9T | Bacteria | <i>Streptococcus gordonii</i>                                 | Glycosyltransferase GtfA/GtfB complex                                                                               | GtfA/GtfB | Q9AET5<br>Q79T00 |
| 5E9U | Bacteria | <i>Streptococcus gordonii</i>                                 | Glycosyltransferase GtfA/GtfB complex                                                                               | GtfA/GtfB | Q9AET5<br>Q79T00 |
| 5GL5 | Fungi    | <i>Saccharomyces cerevisiae</i> (strain ATCC 204508 / S288c)  | Sterol 3-beta-glucosyltransferase                                                                                   | ugt51     | Q06321           |
| 5NLM | Plantae  | <i>Polygonum tinctorium</i>                                   | UDP-glucosyltransferase                                                                                             | PtUGT1    | A0A2R2JFJ4       |
| 5TMB | Plantae  | <i>Oryza sativa subsp. japonica</i>                           | Os70 UDP-glucosyltransferase                                                                                        | UGT70     | Q7XT97           |
| 5TMD | Plantae  | <i>Oryza sativa subsp. japonica</i>                           | UDP-glycosyltransferase 79                                                                                          | UGT79     | Q7XT97           |
| 5TME | Plantae  | <i>Oryza sativa subsp. japonica</i>                           | UDP-glycosyltransferase 79                                                                                          | UGT79     | Q7XT97           |
| 5U6M | Plantae  | <i>Arabidopsis thaliana</i>                                   | UDP-glycosyltransferase 74F2                                                                                        | UGT74F2   | O22822           |
| 5U6N | Plantae  | <i>Arabidopsis thaliana</i>                                   | UDP-glycosyltransferase 74F2                                                                                        | UGT74F2   | O22822           |
| 5U6S | Plantae  | <i>Arabidopsis thaliana</i>                                   | UDP-glycosyltransferase 74F2                                                                                        | UGT74F2   | O22822           |
| 5V2J | Plantae  | <i>Arabidopsis thaliana</i>                                   | UDP-glycosyltransferase 74F2                                                                                        | UGT74F2   | O22822           |
| 5V2K | Plantae  | <i>Arabidopsis thaliana</i>                                   | UDP-glycosyltransferase 74F2                                                                                        | UGT74F2   | O22822           |
| 5XVM | Fungi    | <i>Saccharomyces cerevisiae</i> (strain ATCC 204508 / S288c)  | Sterol 3-beta-glucosyltransferase                                                                                   | ugt51     | Q06321           |
| 6BK2 | Plantae  | <i>Oryza sativa subsp. japonica</i>                           | UDP-glycosyltransferase 79                                                                                          | UGT79     | Q7XT97           |
| 6BK0 | Plantae  | <i>Oryza sativa subsp. japonica</i>                           | UDP-glycosyltransferase 79                                                                                          | UGT79     | Q7XT97           |
| 6BK3 | Plantae  | <i>Oryza sativa subsp. japonica</i>                           | UDP-glycosyltransferase 79                                                                                          | UGT79     | Q7XT97           |
| 6BK1 | Plantae  | <i>Oryza sativa subsp. japonica</i>                           | UDP-glycosyltransferase 79                                                                                          | UGT79     | Q7XT97           |
| 6IJ7 | Plantae  | <i>Arabidopsis thaliana</i>                                   | Flavonol 7-O-rhamnosyltransferase                                                                                   | UGT89C1   | Q9LNE6           |
| 6IJA | Plantae  | <i>Arabidopsis thaliana</i>                                   | Flavonol 7-O-rhamnosyltransferase                                                                                   | UGT89C1   | Q9LNE6           |
| 6IJD | Plantae  | <i>Arabidopsis thaliana</i>                                   | Flavonol 7-O-rhamnosyltransferase                                                                                   | UGT89C1   | Q9LNE6           |
| 6IPB | Animalia | <i>Homo sapiens</i>                                           | UDP-Glucuronosyltransferase 2B15                                                                                    | UGT2B15   | P54855           |
| 6O86 | Plantae  | <i>Stevia rebaudiana</i>                                      | UDP-glycosyltransferase 76G1                                                                                        | UGT76G1   | Q6VAB4           |
| 6O87 | Plantae  | <i>Stevia rebaudiana</i>                                      | UDP-glycosyltransferase 76G1                                                                                        | UGT76G1   | Q6VAB4           |
| 6O88 | Plantae  | <i>Stevia rebaudiana</i>                                      | UDP-glycosyltransferase 76G1                                                                                        | UGT76G1   | Q6VAB4           |



**Table S19.** Mutant UGT1A6 structures produced for investigating effects of specific residues on compound binding

| Importance                         | Original amino acid | Position | Changed amino acid | Purpose                                    |
|------------------------------------|---------------------|----------|--------------------|--------------------------------------------|
| Co-substrate binding               | Ser                 | 37       | Ala                | Examine co-substrate binding               |
| Catalytic                          | His                 | 38       | Ala                | Examine co-substrate and substrate binding |
| Catalytic                          | Asp                 | 150      | Ala                | Examine co-substrate and substrate binding |
| Co-substrate and substrate binding | Arg                 | 172      | Ala                | Examine co-substrate and substrate binding |
| Substrate binding                  | His                 | 180      | Ala                | Examine substrate binding                  |
| Polymorphism                       | Thr                 | 181      | Ala                | Examine substrate binding                  |
| Substrate binding                  | Arg                 | 184      | Ala                | Examine substrate binding                  |
| Polymorphism                       | Arg                 | 184      | Ser                | Examine substrate binding                  |
| Substrate binding                  | Lys                 | 228      | Ala                | Examine substrate binding                  |
| Co-substrate binding               | Ser                 | 308      | Ala                | Examine co-substrate binding               |
| Co-substrate binding               | Trp                 | 353      | Ala                | Examine co-substrate binding               |
| Co-substrate binding               | Leu                 | 354      | Ala                | Examine co-substrate binding               |
| Co-substrate binding               | His                 | 375      | Ala                | Examine co-substrate binding               |
| Co-substrate binding               | Gly                 | 376      | Ala                | Examine co-substrate binding               |
| Co-substrate and substrate binding | Phe                 | 393      | Ala                | Examine co-substrate and substrate binding |

## REFERENCES – SUPPORTING INFORMATION

- (1) Ghemtio, L.; Soikkeli, A.; Yliperttula, M.; Hirvonen, J.; Finel, M.; Xhaard, H. SVM Classification and CoMSIA Modeling of UGT1A6 Interacting Molecules. *J. Chem. Inf. Model.* **2014**, *54* (4), 1011–1026. <https://doi.org/10.1021/ci400577a>.
- (2) Vaidyanathan, J. B.; Walle, T. Glucuronidation and Sulfation of the Tea Flavonoid (–)-Epicatechin by the Human and Rat Enzymes. *Drug Metab. Dispos.* **2002**, *30* (8), 897–903. <https://doi.org/10.1124/dmd.30.8.897>.
- (3) Luukkanen, L.; Taskinen, J.; Kurkela, M.; Kostiaainen, R.; Hirvonen, J.; Finel, M. Kinetic Characterization of the 1a Subfamily of Recombinant Human Udp-Glucuronosyltransferases. *Drug Metab. Dispos.* **2005**, *33* (7), 1017–1026. <https://doi.org/10.1124/dmd.105.004093>.
- (4) Soars, M. G.; Ring, B. J.; Wrighton, S. A. The Effect of Incubation Conditions on the Enzyme Kinetics of Udp-Glucuronosyltransferases. *Drug Metab. Dispos.* **2003**, *31* (6), 762–767. <https://doi.org/10.1124/dmd.31.6.762>.
- (5) Liu, Y.; She, M.; Wu, Z.; Dai, R. The Inhibition Study of Human UDP-Glucuronosyltransferases with Cytochrome P450 Selective Substrates and Inhibitors. *J. Enzyme Inhib. Med. Chem.* **2011**, *26* (3), 386–393. <https://doi.org/10.3109/14756366.2010.518965>.
- (6) Uchaipichat, V.; Mackenzie, P. I.; Guo, X.-H.; Gardner-Stephen, D.; Galetin, A.; Houston, J. B.; Miners, J. O. Human Udp-Glucuronosyltransferases: Isoform Selectivity and Kinetics of 4-Methylumbelliferone and 1-Naphthol Glucuronidation, Effects of Organic Solvents, and Inhibition by Diclofenac and Probenecid. *Drug Metab. Dispos. Biol. Fate Chem.* **2004**, *32* (4), 413–423. <https://doi.org/10.1124/dmd.32.4.413>.
- (7) Manevski, N.; Troberg, J.; Svaluto-Moreolo, P.; Dzedzic, K.; Yli-Kauhaluoma, J.; Finel, M. Albumin Stimulates the Activity of the Human UDP-Glucuronosyltransferases 1A7, 1A8, 1A10, 2A1 and 2B15, but the Effects Are Enzyme and Substrate Dependent. *PLOS ONE* **2013**, *8* (1), e54767. <https://doi.org/10.1371/journal.pone.0054767>.
- (8) Brazier-Hicks, M.; Edwards, R. Functional Importance of the Family 1 Glucosyltransferase UGT72B1 in the Metabolism of Xenobiotics in Arabidopsis Thaliana. *Plant J. Cell Mol. Biol.* **2005**, *42* (4), 556–566. <https://doi.org/10.1111/j.1365-313X.2005.02398.x>.
- (9) Sun, D.; Sharma, A. K.; Dellinger, R. W.; Blevins-Primeau, A. S.; Balliet, R. M.; Chen, G.; Boyiri, T.; Amin, S.; Lazarus, P. Glucuronidation of Active Tamoxifen Metabolites by the Human UDP Glucuronosyltransferases. *Drug Metab. Dispos.* **2007**, *35* (11), 2006–2014. <https://doi.org/10.1124/dmd.107.017145>.
- (10) Zielinska, A.; Lichti, C. F.; Bratton, S.; Mitchell, N. C.; Gallus-Zawada, A.; Le, V.-H.; Finel, M.; Miller, G. P.; Radomska-Pandya, A.; Moran, J. H. Glucuronidation of Monohydroxylated Warfarin Metabolites by Human Liver Microsomes and Human Recombinant UDP-Glucuronosyltransferases. *J. Pharmacol. Exp. Ther.* **2008**, *324* (1), 139–148. <https://doi.org/10.1124/jpet.107.129858>.
- (11) Li, D.; Fournel-Gigleux, S.; Barré, L.; Mulliert, G.; Netter, P.; Magdalou, J.; Ouzzine, M. Identification of Aspartic Acid and Histidine Residues Mediating the Reaction Mechanism and the Substrate Specificity of the Human UDP-Glucuronosyltransferases 1A. *J. Biol. Chem.* **2007**, *282* (50), 36514–36524. <https://doi.org/10.1074/jbc.M703107200>.
- (12) Benoit-Biancamano, M.-O.; Connelly, J.; Villeneuve, L.; Caron, P.; Guillemette, C. Deferiprone Glucuronidation by Human Tissues and Recombinant UDP Glucuronosyltransferase 1A6: An in Vitro Investigation of Genetic and Splice Variants. *Drug Metab. Dispos.* **2009**, *37* (2), 322–329. <https://doi.org/10.1124/dmd.108.023101>.
- (13) Nagar, S.; Zalatoris, J. J.; Blanchard, R. L. Human UGT1A6 Pharmacogenetics: Identification of a Novel SNP, Characterization of Allele Frequencies and Functional Analysis of Recombinant Allozymes in Human Liver Tissue and in Cultured Cells. *Pharmacogenetics* **2004**, *14* (8), 487–499.
- (14) Ethell, B. T.; Ekins, S.; Wang, J.; Burchell, B. Quantitative Structure Activity Relationships for the Glucuronidation of Simple Phenols by Expressed Human UGT1A6 and UGT1A9. *Drug Metab. Dispos.* **2002**, *30* (6), 734–738. <https://doi.org/10.1124/dmd.30.6.734>.
- (15) Miners, J. O.; Bowalgaha, K.; Elliot, D. J.; Baranczewski, P.; Knights, K. M. Characterization of Niflumic Acid as a Selective Inhibitor of Human Liver Microsomal UDP-Glucuronosyltransferase 1A9: Application to the Reaction Phenotyping of Acetaminophen Glucuronidation. *Drug Metab. Dispos.* **2011**, *39* (4), 644–652. <https://doi.org/10.1124/dmd.110.037036>.
- (16) Court, M. H.; Duan, S. X.; Moltke, L. L. von; Greenblatt, D. J.; Patten, C. J.; Miners, J. O.; Mackenzie, P. I. Interindividual Variability in Acetaminophen Glucuronidation by Human Liver Microsomes: Identification of

- Relevant Acetaminophen UDP-Glucuronosyltransferase Isoforms. *J. Pharmacol. Exp. Ther.* **2001**, 299 (3), 998–1006.
- (17) Mutlib, A. E.; Goosen, T. C.; Bauman, J. N.; Williams, J. A.; Kulkarni, S.; Kostrubsky, S. Kinetics of Acetaminophen Glucuronidation by UDP-Glucuronosyltransferases 1A1, 1A6, 1A9 and 2B15. Potential Implications in Acetaminophen-Induced Hepatotoxicity. *Chem. Res. Toxicol.* **2006**, 19 (5), 701–709. <https://doi.org/10.1021/tx050317i>.
- (18) Hagenauer, B.; Salamon, A.; Thalhammer, T.; Kunert, O.; Haslinger, E.; Klingler, P.; Senderowicz, A. M.; Sausville, E. A.; Jäger, W. In Vitro Glucuronidation of the Cyclin-Dependent Kinase Inhibitor Flavopiridol by Rat and Human Liver Microsomes: Involvement of UDP-Glucuronosyltransferases 1A1 and 1A9. *Drug Metab. Dispos.* **2001**, 29 (4), 407–414.
- (19) Liu, X.; Tam, V. H.; Hu, M. Disposition of Flavonoids via Enteric Recycling: Determination of the UDP-Glucuronosyltransferase Isoforms Responsible for the Metabolism of Flavonoids in Intact Caco-2 TC7 Cells Using SiRNA. *Mol. Pharm.* **2007**, 4 (6), 873–882. <https://doi.org/10.1021/mp0601190>.
- (20) Singh, R.; Wu, B.; Tang, L.; Hu, M. Uridine Diphosphate Glucuronosyltransferase Isoform-Dependent Regiospecificity of Glucuronidation of Flavonoids. *J. Agric. Food Chem.* **2011**, 59 (13), 7452–7464. <https://doi.org/10.1021/jf1041454>.
- (21) Ebner, T.; Burchell, B. Substrate Specificities of Two Stably Expressed Human Liver UDP-Glucuronosyltransferases of the UGT1 Gene Family. *Drug Metab. Dispos.* **1993**, 21 (1), 50–55.
- (22) Tang, L.; Singh, R.; Liu, Z.; Hu, M. Structure and Concentration Changes Affect Characterization of UGT Isoform-Specific Metabolism of Isoflavones. *Mol. Pharm.* **2009**, 6 (5), 1466–1482. <https://doi.org/10.1021/mp8002557>.
- (23) Hanioka, N.; Naito, T.; Narimatsu, S. Human UDP-Glucuronosyltransferase Isoforms Involved in Bisphenol A Glucuronidation. *Chemosphere* **2008**, 74 (1), 33–36. <https://doi.org/10.1016/j.chemosphere.2008.09.053>.
- (24) Galijatovic, A.; Otake, Y.; Walle, U. K.; Walle, T. Extensive Metabolism of the Flavonoid Chrysin by Human Caco-2 and Hep G2 Cells. *Xenobiotica* **1999**, 29 (12), 1241–1256. <https://doi.org/10.1080/004982599237912>.
- (25) Walle, T.; Otake, Y.; Galijatovic, A.; Ritter, J. K.; Walle, U. K. Induction of UDP-Glucuronosyltransferase UGT1A1 by the Flavonoid Chrysin in the Human Hepatoma Cell Line Hep G2. *Drug Metab. Dispos.* **2000**, 28 (9), 1077–1082.
- (26) Iwuchukwu, O. F.; Ajetunmobi, J.; Ung, D.; Nagar, S. Characterizing the Effects of Common UDP Glucuronosyltransferase (UGT) 1A6 and UGT1A1 Polymorphisms on Cis- and Trans-Resveratrol Glucuronidation. *Drug Metab. Dispos.* **2009**, 37 (8), 1726–1732. <https://doi.org/10.1124/dmd.109.027391>.
- (27) Holmquist, G. L. Opioid Metabolism and Effects of Cytochrome P450. *Pain Med.* **2009**, 10 (suppl\_1), S20–S29. <https://doi.org/10.1111/j.1526-4637.2009.00596.x>.
- (28) Aprile, S.; Grosso, E. D.; Grosa, G. Identification of the Human UDP-Glucuronosyltransferases Involved in the Glucuronidation of Combretastatin A-4. *Drug Metab. Dispos.* **2010**, 38 (7), 1141–1146. <https://doi.org/10.1124/dmd.109.031435>.
- (29) Doerge, D. R.; Chang, H. C.; Churchwell, M. I.; Holder, C. L. Analysis of Soy Isoflavone Conjugation In Vitro and in Human Blood Using Liquid Chromatography-Mass Spectrometry. *Drug Metab. Dispos.* **2000**, 28 (3), 298–307.
- (30) Liang, S.-C.; Ge, G.-B.; Liu, H.-X.; Zhang, Y.-Y.; Wang, L.-M.; Zhang, J.-W.; Yin, L.; Li, W.; Fang, Z.-Z.; Wu, J.-J.; et al. Identification and Characterization of Human UDP-Glucuronosyltransferases Responsible for the In Vitro Glucuronidation of Daphnetin. *Drug Metab. Dispos.* **2010**, 38 (6), 973–980. <https://doi.org/10.1124/dmd.109.030734>.
- (31) Fernandes, I.; Marques, C.; Évora, A.; Cruz, L.; Freitas, V. de; Calhau, C.; Faria, A.; Mateus, N. Pharmacokinetics of Table and Port Red Wine Anthocyanins: A Crossover Trial in Healthy Men. *Food Funct.* **2017**, 8 (5), 2030–2037. <https://doi.org/10.1039/C7FO00329C>.
- (32) Zeng, X.; Shi, J.; Zhao, M.; Chen, Q.; Wang, L.; Jiang, H.; Luo, F.; Zhu, L.; Lu, L.; Wang, X.; et al. Regioselective Glucuronidation of Diosmetin and Chrysoeriol by the Interplay of Glucuronidation and Transport in UGT1A9-Overexpressing HeLa Cells. *PLOS ONE* **2016**, 11 (11), e0166239. <https://doi.org/10.1371/journal.pone.0166239>.
- (33) Itäaho, K.; Court, M. H.; Uutela, P.; Kostianen, R.; Radomska-Pandya, A.; Finel, M. Dopamine Is a Low-Affinity and High-Specificity Substrate for the Human UDP-Glucuronosyltransferase 1A10. *Drug Metab. Dispos.* **2009**, 37 (4), 768–775. <https://doi.org/10.1124/dmd.108.025692>.
- (34) Lautala, P.; Ethell, B. T.; Taskinen, J.; Burchell, B. The Specificity of Glucuronidation of Entacapone and Tolcapone by Recombinant Human Udp-Glucuronosyltransferases. *Drug Metab. Dispos.* **2000**, 28 (11), 1385–1389.

- (35) Ghosal, A.; Hapangama, N.; Yuan, Y.; Achanfuo-Yeboah, J.; Iannucci, R.; Chowdhury, S.; Alton, K.; Patrick, J. E.; Zbaida, S. Identification of Human Udp-Glucuronosyltransferase Enzyme(s) Responsible for the Glucuronidation of Ezetimibe (Zetia). *Drug Metab. Dispos.* **2004**, *32* (3), 314–320. <https://doi.org/10.1124/dmd.32.3.314>.
- (36) Illingworth, N. A.; Boddy, A. V.; Daly, A. K.; Veal, G. J. Characterization of the Metabolism of Fenretinide by Human Liver Microsomes, Cytochrome P450 Enzymes and UDP-Glucuronosyltransferases. *Br. J. Pharmacol.* **2011**, *162* (4), 989–999. <https://doi.org/10.1111/j.1476-5381.2010.01104.x>.
- (37) Otake, Y.; Hsieh, F.; Walle, T. Glucuronidation versus Oxidation of the Flavonoid Galangin by Human Liver Microsomes and Hepatocytes. *Drug Metab. Dispos.* **2002**, *30* (5), 576–581. <https://doi.org/10.1124/dmd.30.5.576>.
- (38) Brand, W.; Boersma, M. G.; Bik, H.; Hil, E. F. H. den; Vervoort, J.; Barron, D.; Meinel, W.; Glatt, H.; Williamson, G.; Bladeren, P. J. van; et al. Phase II Metabolism of Hesperetin by Individual UDP-Glucuronosyltransferases and Sulfotransferases and Rat and Human Tissue Samples. *Drug Metab. Dispos.* **2010**, *38* (4), 617–625. <https://doi.org/10.1124/dmd.109.031047>.
- (39) Gagné, J.-F.; Montminy, V.; Belanger, P.; Journault, K.; Gaucher, G.; Guillemette, C. Common Human UGT1A Polymorphisms and the Altered Metabolism of Irinotecan Active Metabolite 7-Ethyl-10-Hydroxycamptothecin (SN-38). *Mol. Pharmacol.* **2002**, *62* (3), 608–617. <https://doi.org/10.1124/mol.62.3.608>.
- (40) Hanioka, N.; Ozawa, S.; Jinno, H.; Ando, M.; Saito, Y.; Sawada, J. Human Liver UDP-Glucuronosyltransferase Isoforms Involved in the Glucuronidation of 7-Ethyl-10-Hydroxycamptothecin. *Xenobiotica* **2001**, *31* (10), 687–699. <https://doi.org/10.1080/00498250110057341>.
- (41) Li, Y.; Lu, L.; Wang, L.; Qu, W.; Liu, W.; Xie, Y.; Zheng, H.; Wang, Y.; Qi, X.; Hu, M.; et al. Interplay of Efflux Transporters with Glucuronidation and Its Impact on Subcellular Aglycone and Glucuronide Disposition: A Case Study with Kaempferol. *Mol. Pharm.* **2018**, *15* (12), 5602–5614. <https://doi.org/10.1021/acs.molpharmaceut.8b00782>.
- (42) Picard, N.; Ratanasavanh, D.; Prémaud, A.; Meur, Y. L.; Marquet, P. Identification of the Udp-Glucuronosyltransferase Isoforms Involved in Mycophenolic Acid Phase II Metabolism. *Drug Metab. Dispos.* **2005**, *33* (1), 139–146. <https://doi.org/10.1124/dmd.104.001651>.
- (43) Jiang, W.; Hu, M. Mutual Interactions between Flavonoids and Enzymatic and Transporter Elements Responsible for Flavonoid Disposition via Phase II Metabolic Pathways. *RSC Adv.* **2012**, *2* (21), 7948–7963. <https://doi.org/10.1039/C2RA01369J>.
- (44) Hengstmann, J. H.; Goronzy, J. Pharmacokinetics Of 3H-Phenylephrine in Man. *Eur. J. Clin. Pharmacol.* **1982**, *21* (4), 335–341. <https://doi.org/10.1007/BF00637623>.
- (45) Miksits, M.; Maier-Salamon, A.; Vo, T. P. N.; Sulyok, M.; Schuhmacher, R.; Szekeres, T.; Jäger, W. Glucuronidation of Piceatannol by Human Liver Microsomes: Major Role of UGT1A1, UGT1A8 and UGT1A10. *J. Pharm. Pharmacol.* **2010**, *62* (1), 47–54. <https://doi.org/10.1211/jpp.62.01.0004>.
- (46) Boersma, M. G.; van der Woude, H.; Bogaards, J.; Boeren, S.; Vervoort, J.; Cnubben, N. H. P.; van Iersel, M. L. P. S.; van Bladeren, P. J.; Rietjens, I. M. C. M. Regioselectivity of Phase II Metabolism of Luteolin and Quercetin by UDP-Glucuronosyl Transferases. *Chem. Res. Toxicol.* **2002**, *15* (5), 662–670. <https://doi.org/10.1021/tx0101705>.
- (47) Sun, D.; Jones, N. R.; Manni, A.; Lazarus, P. Characterization of Raloxifene Glucuronidation: Potential Role of UGT1A8 Genotype on Raloxifene Metabolism In Vivo. *Cancer Prev. Res. (Phila. Pa.)* **2013**, *6* (7), 719–730. <https://doi.org/10.1158/1940-6207.CAPR-12-0448>.
- (48) Krishnaswamy, S.; Duan, S. X.; Moltke, L. L. V.; Greenblatt, D. J.; Sudmeier, J. L.; Bachovchin, W. W.; Court, M. H. Serotonin (5-Hydroxytryptamine) Glucuronidation in Vitro : Assay Development, Human Liver Microsome Activities and Species Differences. *Xenobiotica* **2003**, *33* (2), 169–180. <https://doi.org/10.1080/0049825021000048809>.
- (49) Krishnaswamy, S.; Hao, Q.; Al-Rohaimi, A.; Hesse, L. M.; Moltke, L. L. von; Greenblatt, D. J.; Court, M. H. UDP Glucuronosyltransferase (UGT) 1A6 Pharmacogenetics: II. Functional Impact of the Three Most Common Nonsynonymous UGT1A6 Polymorphisms (S7A, T181A, and R184S). *J. Pharmacol. Exp. Ther.* **2005**, *313* (3), 1340–1346. <https://doi.org/10.1124/jpet.104.081968>.
- (50) Ishii, Y.; Koba, H.; Kinoshita, K.; Oizaki, T.; Iwamoto, Y.; Takeda, S.; Miyauchi, Y.; Nishimura, Y.; Egoshi, N.; Taura, F.; et al. Alteration of the Function of the UDP-Glucuronosyltransferase 1A Subfamily by Cytochrome P450 3A4: Different Susceptibility for UGT Isoforms and UGT1A1/7 Variants. *Drug Metab. Dispos.* **2014**, *42* (2), 229–238. <https://doi.org/10.1124/dmd.113.054833>.

- (51) Sten, T.; Bichlmaier, I.; Kuuranne, T.; Leinonen, A.; Yli-Kauhaluoma, J.; Finel, M. UDP-Glucuronosyltransferases (UGTs) 2B7 and UGT2B17 Display Converse Specificity in Testosterone and Epitestosterone Glucuronidation, Whereas UGT2A1 Conjugates Both Androgens Similarly. *Drug Metab. Dispos.* **2009**, *37* (2), 417–423. <https://doi.org/10.1124/dmd.108.024844>.
- (52) Brill, S. S.; Furimsky, A. M.; Ho, M. N.; Furniss, M. J.; Li, Y.; Green, A. G.; Green, C. E.; Iyer, L. V.; Bradford, W. W.; Kapetanovic, I. M. Glucuronidation of Trans-Resveratrol by Human Liver and Intestinal Microsomes and UGT Isoforms. *J. Pharm. Pharmacol.* **2006**, *58* (4), 469–479. <https://doi.org/10.1211/jpp.58.4.0006>.
- (53) Ruefer, C. E.; Gerhäuser, C.; Frank, N.; Becker, H.; Kulling, S. E. In Vitro Phase II Metabolism of Xanthohumol by Human UDP-Glucuronosyltransferases and Sulfotransferases. *Mol. Nutr. Food Res.* **2005**, *49* (9), 851–856. <https://doi.org/10.1002/mnfr.200500057>.
